# Supplementary material
Source: PubMed Central journal article supplement (PMC6264638)

A

| Clinical indexes          | AKI (n=8)               | Non-AKI (n=7)                                                                                                 | P Value |
|---------------------------|-------------------------|---------------------------------------------------------------------------------------------------------------|---------|
| Sex                       | M (4) F(4)              | M (6) F (1)                                                                                                   | 0.1432  |
| Age (year)                | 46.8±13.5               | 38.6±15.5                                                                                                     | 0.3334  |
| Hypertension              | 63%                     | 14%                                                                                                           | 0.0572  |
| Diabetes                  | All negative            | All negative                                                                                                  |         |
| BUN(mg/dL)*               | 45.33±19.54             | 15.25±5.59                                                                                                    | 0.0043  |
| Serum Creatinine (mg/dL)* | 6.14±1.81               | 0.85±0.15                                                                                                     | 0.0001  |
| Diagnosis                 | AKI (7)<br>ESRD/AKI (1) | FSGS (1)<br>IgA nephropathy (3)<br>Membranous nephropathy (2)<br>Membranoproliferative glomerulonephritis (1) |         |

B

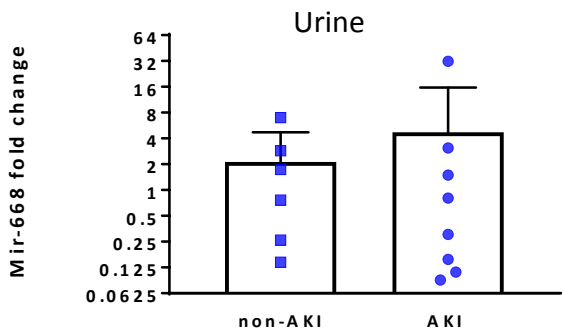

C

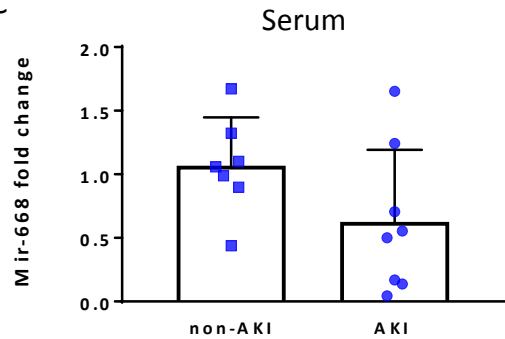

**Supplementary Figure 1** (A) Clinical data of AKI and non-AKI patients examined. (Pearson's Chi-Square test for Sex and hypertension frequency difference comparison and 2-tailed student's t-test for all other comparison). \*, statistically significant difference between AKI and non-AKI group. (B) mir-668 in urine samples from patients (n=8 for AKI, n=6 for non-AKI). (C) mir-668 in serum samples from patients (n=8 for AKI, n=7 for non-AKI).

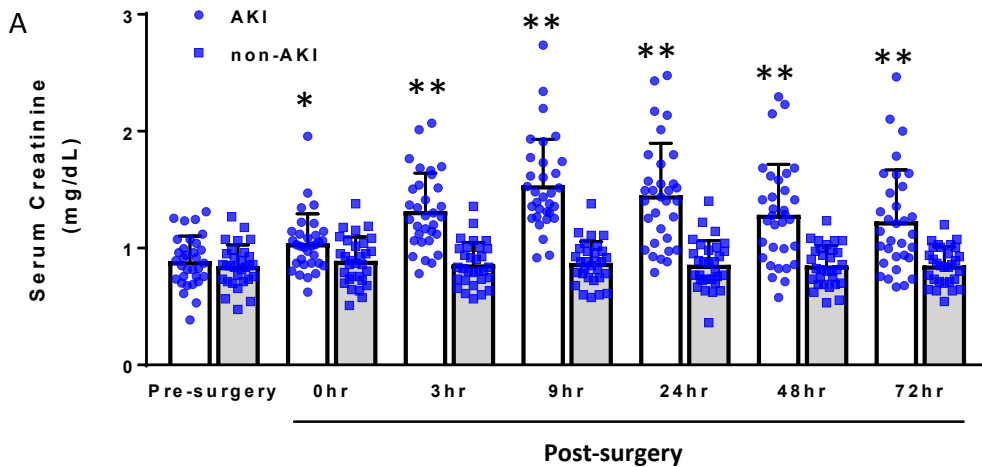

**B**

| Clinical Indexes                                   | Non AKI (n=30)             | AKI (n=32)                 | P Value |
|----------------------------------------------------|----------------------------|----------------------------|---------|
| Sex                                                | M 20 (66.7%); F 10 (33.3%) | M 22 (68.8%); F 10 (31.3%) | 0.8608  |
| Age (year)                                         | 59.3 ± 10.1                | 61.5 ± 9.5                 | 0.3819  |
| Hypertension                                       | 8 (26.7%)                  | 9 (28.1%)                  | 0.8976  |
| Diabetes                                           | 4 (13.3%)                  | 5 (15.6%)                  | 0.7980  |
| Cerebrovascular disease                            | 1 (8.3%)                   | 2 (6.3%)                   | 0.5928  |
| NYHA>2                                             | 25 (83.3%)                 | 29 (90.6%)                 | 0.3921  |
| Contrast medium usage within 1 week before surgery | 11 (36.7%)                 | 10 (31.3%)                 | 0.6524  |
| CPB time (minutes)                                 | 107.1 ± 14.2               | 105.4 ± 23.3               | 0.7284  |
| Aortic cross-clamping time (minutes)               | 67.4 ± 13.6                | 64.8 ± 21.4                | 0.5804  |
| Death rate                                         | 0                          | 0                          |         |

**Supplementary Figure 2** (A) Serum creatinine of cardiopulmonary bypass surgery patients with or without AKI. Serum samples were collected from the patients before surgery or at the indicated time-points after surgery for creatinine measurement (n=30 for non-AKI, n=32 for AKI). \*, P<0.05; \*\*, P<0.01; 2-tailed student's t-test between AKI and non-AKI groups. (B) Clinical data of the patients recruited in the study. (Pearson's Chi-Square test for Sex, hypertension, diabetes, cerebrovascular disease, NYHA and contrast medium usage difference comparison; 2-tailed student's t-test for all other comparison). NYHA, New York Heart Association Classification; CPB, cardiopulmonary bypass time.

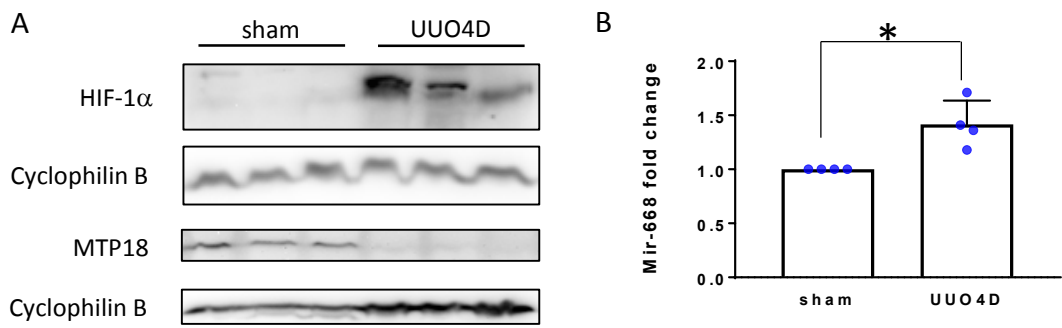

**Supplementary Fig. 3 HIF-1 related induction of mir-668 and MTP18 inhibition in unilateral ureteral obstructed kidney.** C57BL/6 male mice were subjected to unilateral ureteral obstruction surgery and kept for 4 days (UUO4D). Sham operated mouse kidneys were used for comparison. (A) Immunoblots indicating the induction of HIF-1 $\alpha$  and MTP18 suppression in UUO4D kidneys (n=3). Cyclophilin B was used as loading control. (B) qPCR of mir-668 indicating the induction of mir-668 in UUO4D kidneys (n=4, 2-tailed student t-test. \*, P=0.0326).

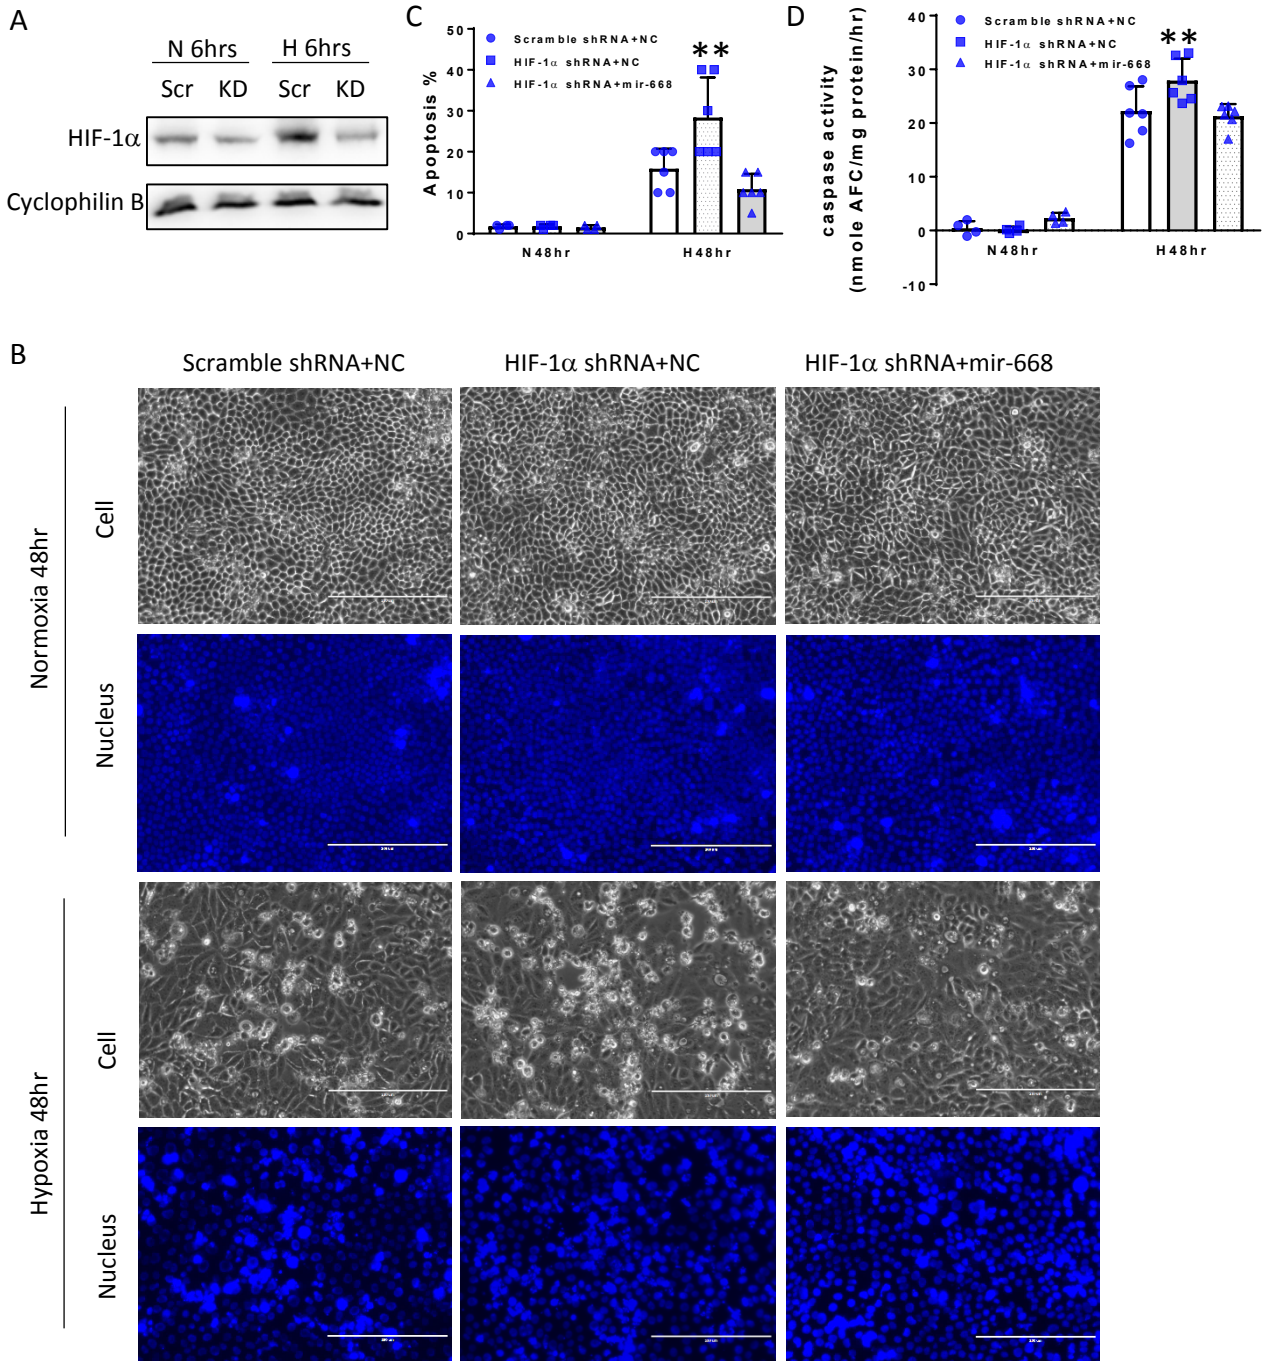

**Supplementary Figure 4 Mir-668 reverses HIF-1 $\alpha$  deficiency induced induced renal cell apoptosis under hypoxia.** RPTC stable cell lines were established with scramble shRNA (Scr) or HIF-1 $\alpha$  shRNA (KD) transfection and puromycin selection. The cells were transfected with negative control (NC) or mir-668 mimics and treated with hypoxia. (A) Immunoblots indicating the inhibition of HIF-1 $\alpha$  induction by shRNA at 6 hours of normoxia/hypoxia. Cyclophilin B was used as loading control. Experiments were repeated three times. (B) Representative cell and nuclear images showing more apoptosis in HIF-1 $\alpha$  knockdown cells after 48 hours of hypoxia treatment and the reverse effect by mir-668 overexpression. (C) Percentage of apoptosis after 48 hours of normoxia/hypoxia. \*\*,  $P=0.0003$ , paired one way ANOVA test comparing the hypoxia groups. (D) Caspase activity after 48 hours of normoxia/hypoxia. \*\*,  $P=0.0080$ , paired one way ANOVA test comparing the hypoxia groups.  $n=4$  for Normoxia groups,  $n=6$  for hypoxia groups.

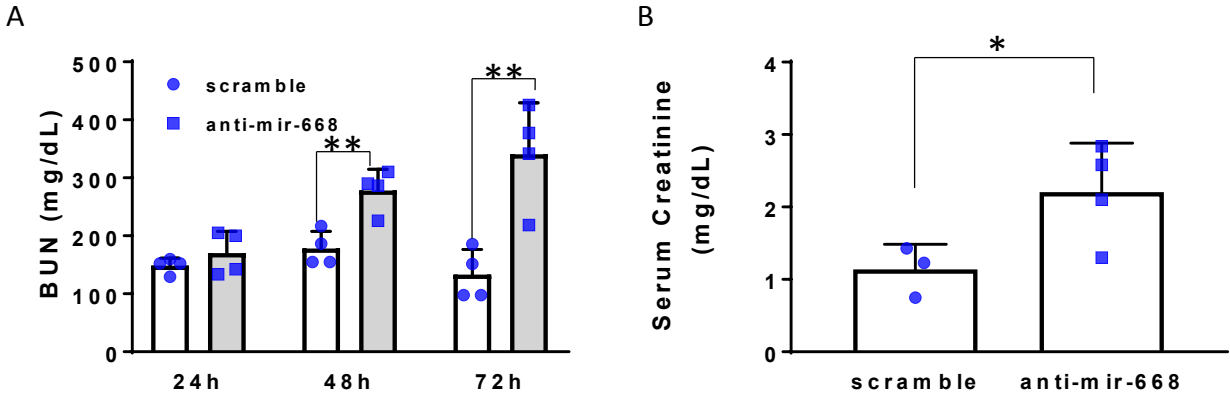

**Supplementary Figure 5 Anti-mir-668 worsens AKI induced by 25 minutes of bilateral renal ischemia-reperfusion.** Mice were administered with 20mg/kg scramble sequence or anti-mir-668 LNAs 2 days before 25 minutes of bilateral renal ischemia-reperfusion. (A) Significantly higher BUN in anti-mir-668 injected mice at 48 and 72 hours of reperfusion (n=4. \*\*, P=0.0095 for 48h; P=0.0094 for 72h, 2-tailed student's t-test). (B) Significantly higher serum creatinine in anti-mir-668 injected mice at 72 hours of reperfusion (n=3 for scramble and n=4 for anti-mir-668. \*, P=0.046, 2-tailed student's t-test).

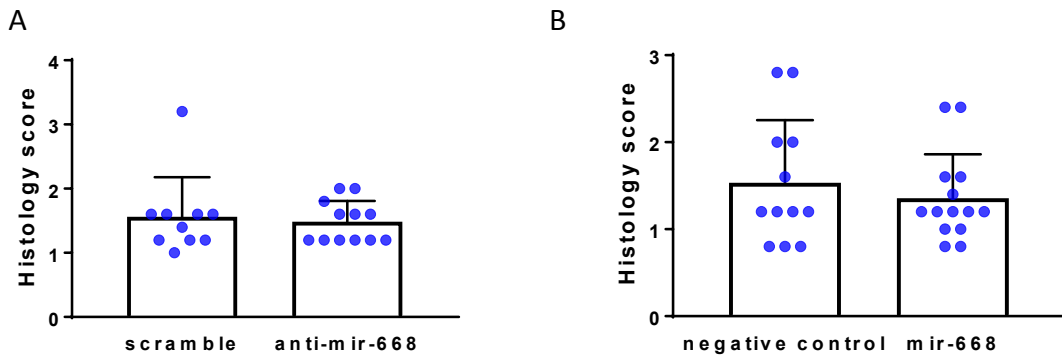

**Supplementary Figure 6 mir-668 does not significantly affect histological tubular damage in ischemic AKI.** Histological tubular damage was assessed following hematoxylin and eosin staining. The injury was scaled from 0-4 according to the estimation of the percentage from 0-100%. (A) Effect of anti-mir-668-LNA on histological tubular damage induced by 28 minutes of bilateral kidney ischemia and 48 hours of reperfusion (n=10 for left and right kidneys respectively from scramble group, n=12 for left and right kidneys respectively from anti-mir-668 group). (B) Effect of mir-668 mimic on histological tubular damage induced by 30 minutes of bilateral renal ischemia with 48 hours of reperfusion (n=12 for left and right kidneys respectively from negative control group, n=14 for left and right kidneys respectively from mir-668 group).

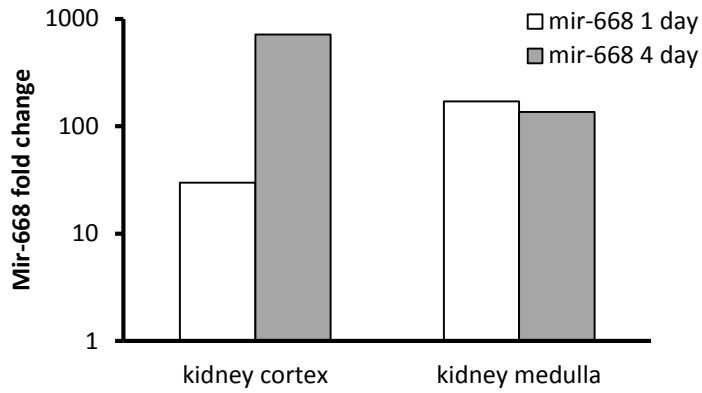

**Supplementary Figure 7 Quantitative real time PCR showing mir-668 increases in kidneys after mir-668 mimic administration comparing to negative controls (n=1).** Negative control or mir-668 mimic oligos were delivered to C57BL/6J male mice through tail vein injection to collect kidney cortex and medulla tissues at 1 day or 4 days for qPCR assay.

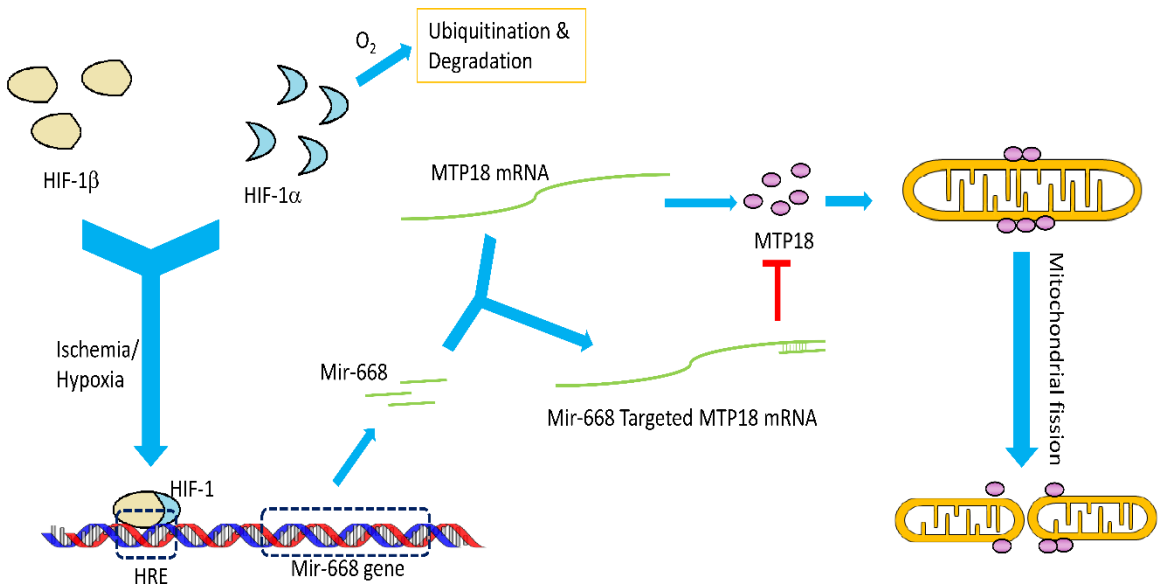

**Supplementary Figure 8 Schematic diagram of the HIF-1/mir-668/MTP18 pathway in mitochondrial regulation.** Under ischemia/hypoxia, HIF-1 $\alpha$  is stabilized to associate with HIF-1 $\beta$ , forming the functional dimer of HIF-1. HIF-1 then translocates into the nucleus and binds to hypoxia-responsive elements (HRE) leading to the transcription of relevant genes, such as mir-668. mir-668 can bind to MTP18 mRNA to repress the translation and expression of MTP18 (a mitochondrial fission protein) resulting in the prevention of mitochondrial fragmentation.



**Supplementary Table 1 Protein-coding genes with their mRNAs pulled down in mir-668 miRISC.** HEK293 cells were transfected with negative control (NC) and mir-668 mimics (mir-668). The miRISC complex was precipitated by Ago 2 antibodies followed by RNA-seq. The precipitated mRNAs with over 2 fold increase in mir-668 group (vs. NC) were identified, of which 124 having miR-668–targeting seed sequence are listed. They are categorized by their fold change in total RNAs from mir-668 group vs NC group.

| 668 total/NC total<0.8<br>(25 genes) | 0.8<668 total/NC total<2<br>(71 genes) |                |          | 668 total/NC total>2<br>(28 genes) |        |
|--------------------------------------|----------------------------------------|----------------|----------|------------------------------------|--------|
| SHD                                  | DNALI1                                 | SLC26A1        | CD4      | IFI44L                             | KCNK3  |
| KLHL30                               | HES2                                   | POU2F2         | INPP5D   | FUT3                               | NOVA2  |
| LAIR1                                | CTNNBIP1                               | ZC3H12B        | SCARA5   | PCSK2                              | STK32B |
| C9orf85                              | PKD1L2                                 | SLC17A7        | PELI3    | SMOC2                              |        |
| LRRC32                               | APBA1                                  | MICA           | KIAA1199 | ZFP3                               |        |
| C22orf24                             | FGD3                                   | SHANK2         | KCNA1    | CHODL                              |        |
| GPR61                                | OAS2                                   | MTFP1, SEC14L2 | CSMD2    | RSAD2                              |        |
| AQP4                                 | SCUBE2                                 | MDGA1          | MGLL     | GBP1                               |        |
| RGSL1                                | LRRC2                                  | C3orf15        | KNDC1    | LRP1B                              |        |
| GDF9                                 | FAM57B                                 | TMEM155        | IGSF11   | SLC6A12                            |        |
| FAT2                                 | ATP8B3                                 | B3GAT3         | CUX2     | DACT2                              |        |
| NFASC                                | ROM1                                   | SAMD12         | CDH1     | DIO2                               |        |
| B9D2                                 | RHEBL1                                 | PLXNB3, SPRK3  | CDH13    | GABBR2                             |        |
| SHROOM4                              | FMN1                                   | ALDH1A1        | SLC15A1  | HS3ST1                             |        |
| PPEF1                                | BMP8A                                  | ANKRD20A4      | SLC9A9   | C6orf97                            |        |
| TEC                                  | GCK                                    | ZNF805         | FAM182A  | GLRA2                              |        |
| C19orf52                             | RAB40C                                 | PRDM16         | PDE4C    | ZNF626                             |        |
| TST                                  | TNFRSF8                                | TNFSF10        | SHISA7   | CYLC2                              |        |
| ZNF347                               | PTPRN2                                 | ALDH1L2        | IGFN1    | PCDH11Y                            |        |
| GPR146                               | COL7A1                                 | IL22RA1        |          | MC2R                               |        |
| OLIG1                                | KCNQ2                                  | DNAH10         |          | APOL1                              |        |
| ECHDC3                               | XKRX                                   | RASD2          |          | CD3G                               |        |
| TNFSF4                               | PPM1H                                  | KLRG1          |          | HHLA1                              |        |
| ST6GALNAC5                           | TTBK1                                  | MYOZ3          |          | IKZF1                              |        |
| RELN                                 | SHC4                                   | C5AR1          |          | KCNJ5                              |        |

**Supplementary Table 2 List of potential mir-668 binding sites in 3'-UTR of MTP18 gene (MTFP1) predicted by Segal Lab computation. (A) The predicted sites for human gene. 1, 2, the top two sites examined by luciferase analysis. (B) The predicted sites for mouse gene. (C) The predicted sites for rat gene. DGduplex, the free energy gained by the binding of the microRNA to the target. DGopen, the free energy lost by unpairing the target-site nucleotides. DDG, the difference between DGduplex and DGopen.**

| A | Gene                                             | microRNA                    | Position | Seed  | $\Delta G_{duplex}$ | $\Delta G_{open}$ | $\Delta \Delta G$ |
|---|--------------------------------------------------|-----------------------------|----------|-------|---------------------|-------------------|-------------------|
|   | MTFP1-001 utr3:KNOWN_protein_coding <sup>1</sup> | hsa-miR-668-3p MIMAT0003881 | 139      | 6:1:0 | -24                 | -9.31             | -14.68            |
|   | MTFP1-001 utr3:KNOWN_protein_coding <sup>2</sup> | hsa-miR-668-3p MIMAT0003881 | 414      | 7:1:1 | -20.9               | -10.26            | -10.63            |
|   | MTFP1-001 utr3:KNOWN_protein_coding              | hsa-miR-668-3p MIMAT0003881 | 236      | 6:1:1 | -18.6               | -11.13            | -7.46             |
|   | MTFP1-001 utr3:KNOWN_protein_coding              | hsa-miR-668-3p MIMAT0003881 | 161      | 6:0:1 | -14.4               | -8.55             | -5.84             |
|   | MTFP1-001 utr3:KNOWN_protein_coding              | hsa-miR-668-3p MIMAT0003881 | 229      | 7:1:1 | -17.6               | -12.43            | -5.16             |
|   | MTFP1-001 utr3:KNOWN_protein_coding              | hsa-miR-668-3p MIMAT0003881 | 173      | 7:1:0 | -16.6               | -11.94            | -4.65             |
|   | MTFP1-001 utr3:KNOWN_protein_coding              | hsa-miR-668-3p MIMAT0003881 | 383      | 7:1:0 | -15.87              | -12.28            | -3.58             |
|   | MTFP1-001 utr3:KNOWN_protein_coding              | hsa-miR-668-3p MIMAT0003881 | 456      | 6:1:0 | -11.1               | -13.5             | 2.4               |
|   | MTFP1-001 utr3:KNOWN_protein_coding              | hsa-miR-668-3p MIMAT0003881 | 89       | 6:1:1 | -15                 | -19.84            | 4.84              |
|   | MTFP1-001 utr3:KNOWN_protein_coding              | hsa-miR-668-3p MIMAT0003881 | 299      | 7:1:0 | -11.8               | -16.87            | 5.07              |

  

| B | Gene                                | microRNA                    | Position | Seed  | $\Delta G_{duplex}$ | $\Delta G_{open}$ | $\Delta \Delta G$ |
|---|-------------------------------------|-----------------------------|----------|-------|---------------------|-------------------|-------------------|
|   | Mtfp1-001 utr3:KNOWN_protein_coding | mmu-miR-668-3p MIMAT0003732 | 593      | 7:1:0 | -24.1               | -10.41            | -13.68            |
|   | Mtfp1-001 utr3:KNOWN_protein_coding | mmu-miR-668-3p MIMAT0003732 | 114      | 6:1:1 | -21.2               | -9.1              | -12.09            |
|   | Mtfp1-001 utr3:KNOWN_protein_coding | mmu-miR-668-3p MIMAT0003732 | 197      | 7:1:1 | -24.9               | -12.81            | -12.08            |
|   | Mtfp1-001 utr3:KNOWN_protein_coding | mmu-miR-668-3p MIMAT0003732 | 136      | 6:0:1 | -20.26              | -8.84             | -11.41            |
|   | Mtfp1-001 utr3:KNOWN_protein_coding | mmu-miR-668-3p MIMAT0003732 | 535      | 6:1:0 | -19.4               | -8.46             | -10.93            |
|   | Mtfp1-001 utr3:KNOWN_protein_coding | mmu-miR-668-3p MIMAT0003732 | 542      | 6:1:0 | -15.61              | -5.32             | -10.28            |
|   | Mtfp1-001 utr3:KNOWN_protein_coding | mmu-miR-668-3p MIMAT0003732 | 55       | 6:1:1 | -19.73              | -10.04            | -9.68             |
|   | Mtfp1-001 utr3:KNOWN_protein_coding | mmu-miR-668-3p MIMAT0003732 | 715      | 6:1:1 | -15.86              | -7.2              | -8.65             |
|   | Mtfp1-001 utr3:KNOWN_protein_coding | mmu-miR-668-3p MIMAT0003732 | 688      | 6:1:1 | -23.2               | -15.75            | -7.44             |
|   | Mtfp1-001 utr3:KNOWN_protein_coding | mmu-miR-668-3p MIMAT0003732 | 179      | 6:0:1 | -22.42              | -17.86            | -4.55             |
|   | Mtfp1-001 utr3:KNOWN_protein_coding | mmu-miR-668-3p MIMAT0003732 | 585      | 7:1:1 | -15.25              | -13.15            | -2.09             |
|   | Mtfp1-001 utr3:KNOWN_protein_coding | mmu-miR-668-3p MIMAT0003732 | 142      | 6:1:0 | -14.9               | -13.03            | -1.86             |
|   | Mtfp1-001 utr3:KNOWN_protein_coding | mmu-miR-668-3p MIMAT0003732 | 691      | 7:1:1 | -22.3               | -20.58            | -1.71             |
|   | Mtfp1-001 utr3:KNOWN_protein_coding | mmu-miR-668-3p MIMAT0003732 | 268      | 6:1:1 | -5.2                | -3.85             | -1.34             |
|   | Mtfp1-001 utr3:KNOWN_protein_coding | mmu-miR-668-3p MIMAT0003732 | 100      | 6:1:1 | -13.2               | -12.74            | -0.45             |
|   | Mtfp1-001 utr3:KNOWN_protein_coding | mmu-miR-668-3p MIMAT0003732 | 741      | 6:1:1 | -4.4                | -4.33             | -0.069            |
|   | Mtfp1-001 utr3:KNOWN_protein_coding | mmu-miR-668-3p MIMAT0003732 | 351      | 6:1:1 | -14.6               | -15.91            | 1.31              |
|   | Mtfp1-001 utr3:KNOWN_protein_coding | mmu-miR-668-3p MIMAT0003732 | 416      | 6:1:1 | -12.96              | -16.22            | 3.26              |
|   | Mtfp1-001 utr3:KNOWN_protein_coding | mmu-miR-668-3p MIMAT0003732 | 570      | 6:1:0 | -12.26              | -18.34            | 6.08              |

  

| C | Gene                                | microRNA                 | Position | Seed  | $\Delta G_{duplex}$ | $\Delta G_{open}$ | $\Delta \Delta G$ |
|---|-------------------------------------|--------------------------|----------|-------|---------------------|-------------------|-------------------|
|   | Mtfp1-201 utr3:KNOWN_protein_coding | rno-miR-668 MIMAT0012839 | 698      | 6:1:1 | -18.9               | -6.15             | -12.74            |
|   | Mtfp1-201 utr3:KNOWN_protein_coding | rno-miR-668 MIMAT0012839 | 673      | 8:1:1 | -28.1               | -16.9             | -11.19            |
|   | Mtfp1-201 utr3:KNOWN_protein_coding | rno-miR-668 MIMAT0012839 | 179      | 7:1:1 | -28                 | -18.76            | -9.23             |
|   | Mtfp1-201 utr3:KNOWN_protein_coding | rno-miR-668 MIMAT0012839 | 123      | 6:1:0 | -21.01              | -13               | -8                |
|   | Mtfp1-201 utr3:KNOWN_protein_coding | rno-miR-668 MIMAT0012839 | 523      | 6:1:0 | -15.45              | -8.98             | -6.46             |
|   | Mtfp1-201 utr3:KNOWN_protein_coding | rno-miR-668 MIMAT0012839 | 567      | 6:1:1 | -17.42              | -11.3             | -6.11             |
|   | Mtfp1-201 utr3:KNOWN_protein_coding | rno-miR-668 MIMAT0012839 | 193      | 6:1:1 | -18                 | -12.04            | -5.95             |
|   | Mtfp1-201 utr3:KNOWN_protein_coding | rno-miR-668 MIMAT0012839 | 559      | 6:1:1 | -17.15              | -11.53            | -5.61             |
|   | Mtfp1-201 utr3:KNOWN_protein_coding | rno-miR-668 MIMAT0012839 | 55       | 6:1:1 | -17.64              | -12.93            | -4.7              |
|   | Mtfp1-201 utr3:KNOWN_protein_coding | rno-miR-668 MIMAT0012839 | 94       | 6:1:1 | -12.6               | -8.41             | -4.18             |
|   | Mtfp1-201 utr3:KNOWN_protein_coding | rno-miR-668 MIMAT0012839 | 23       | 7:1:1 | -15.3               | -12.75            | -2.54             |
|   | Mtfp1-201 utr3:KNOWN_protein_coding | rno-miR-668 MIMAT0012839 | 574      | 7:1:0 | -15.6               | -13.28            | -2.31             |
|   | Mtfp1-201 utr3:KNOWN_protein_coding | rno-miR-668 MIMAT0012839 | 724      | 6:1:1 | -4.4                | -2.8              | -1.59             |
|   | Mtfp1-201 utr3:KNOWN_protein_coding | rno-miR-668 MIMAT0012839 | 161      | 6:0:1 | -17.99              | -16.46            | -1.52             |
|   | Mtfp1-201 utr3:KNOWN_protein_coding | rno-miR-668 MIMAT0012839 | 551      | 6:1:0 | -13.84              | -12.44            | -1.39             |
|   | Mtfp1-201 utr3:KNOWN_protein_coding | rno-miR-668 MIMAT0012839 | 393      | 6:1:1 | -16.55              | -15.3             | -1.24             |
|   | Mtfp1-201 utr3:KNOWN_protein_coding | rno-miR-668 MIMAT0012839 | 249      | 6:1:1 | -5.7                | -6.1              | 0.4               |
|   | Mtfp1-201 utr3:KNOWN_protein_coding | rno-miR-668 MIMAT0012839 | 116      | 6:1:1 | -16.45              | -17.2             | 0.75              |
|   | Mtfp1-201 utr3:KNOWN_protein_coding | rno-miR-668 MIMAT0012839 | 296      | 6:1:1 | -6.4                | -8.14             | 1.74              |
|   | Mtfp1-201 utr3:KNOWN_protein_coding | rno-miR-668 MIMAT0012839 | 448      | 6:1:1 | -10.31              | -14.25            | 3.94              |
|   | Mtfp1-201 utr3:KNOWN_protein_coding | rno-miR-668 MIMAT0012839 | 328      | 6:1:1 | -8.01               | -13.32            | 5.31              |

Full unedited blot for Figure 1A

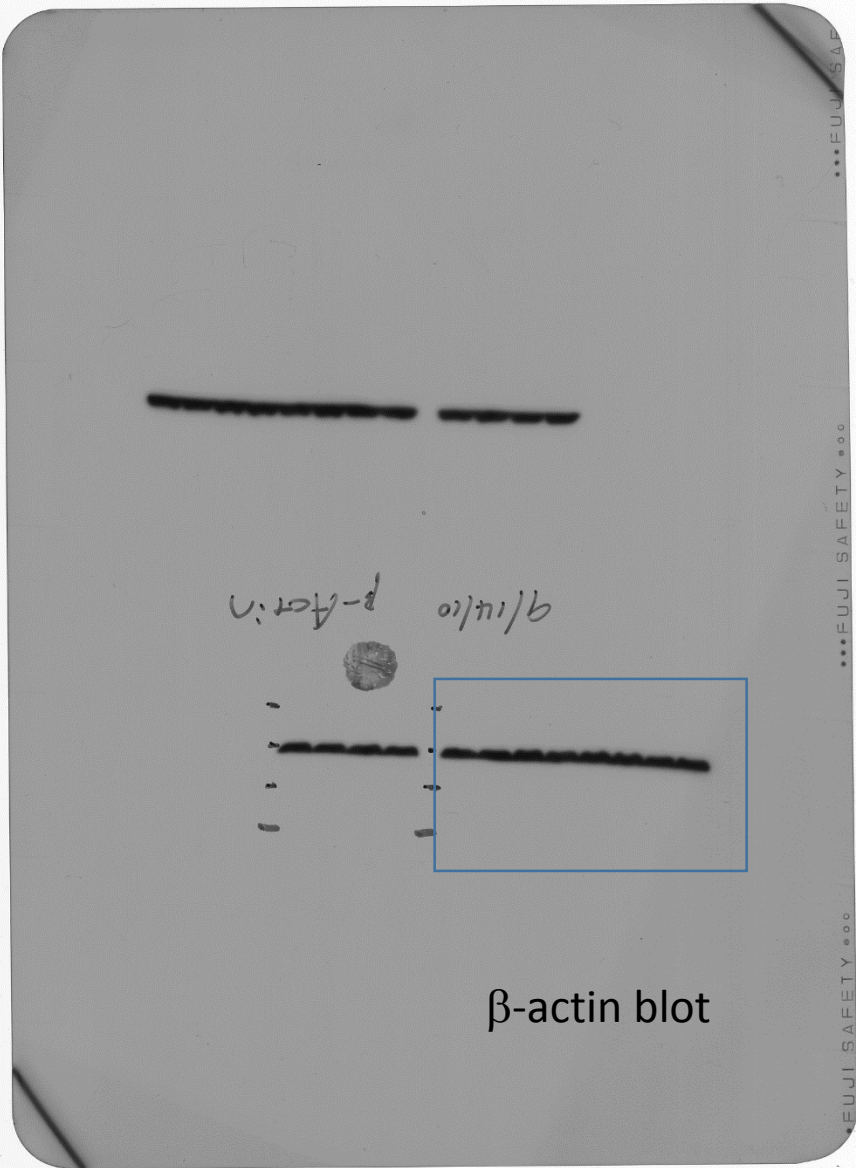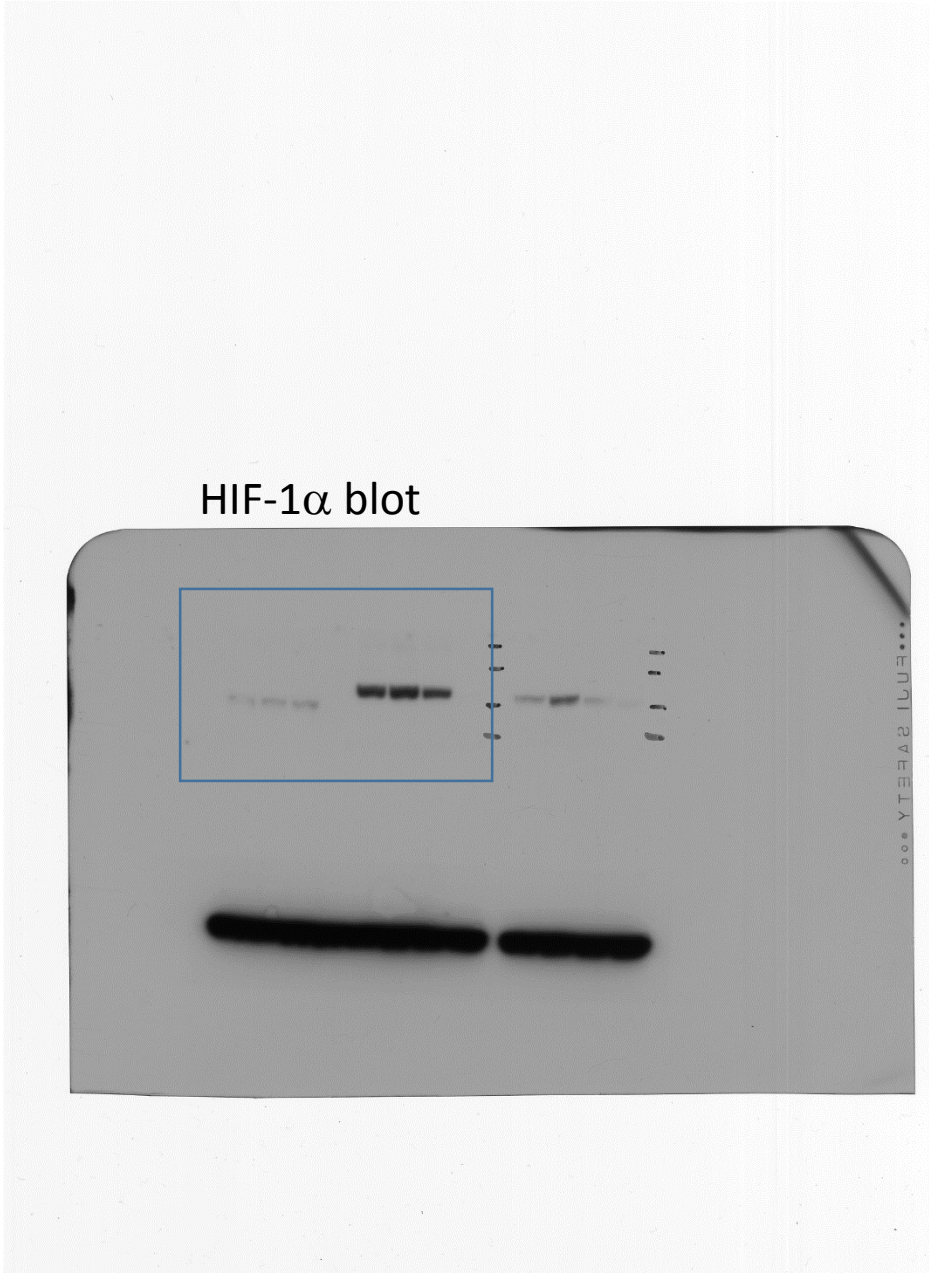

# Full images for Figure 4H

Cyclophilin b blot

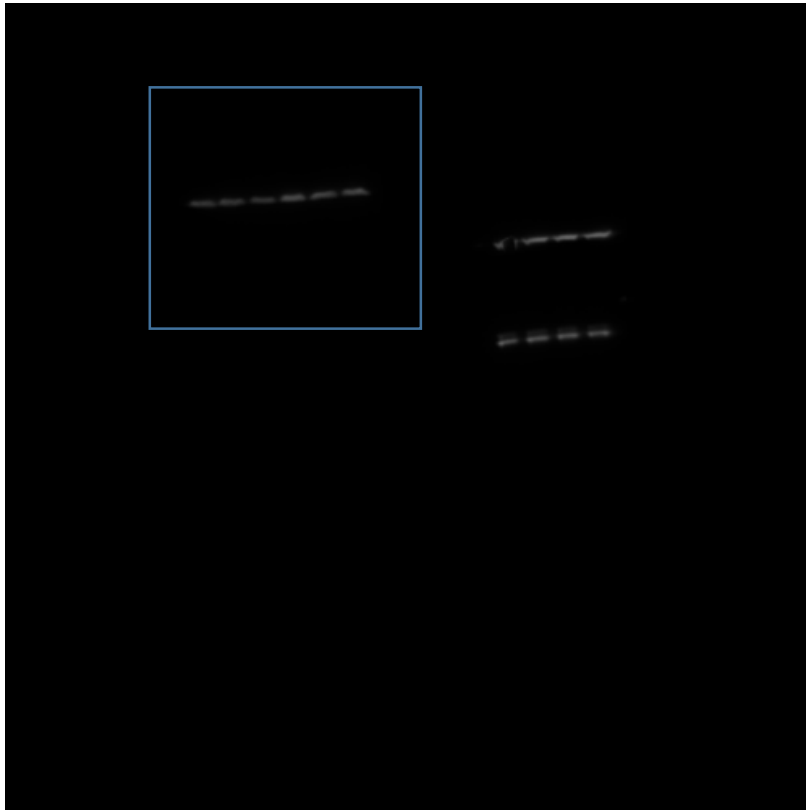

Picture of PVDF membrane

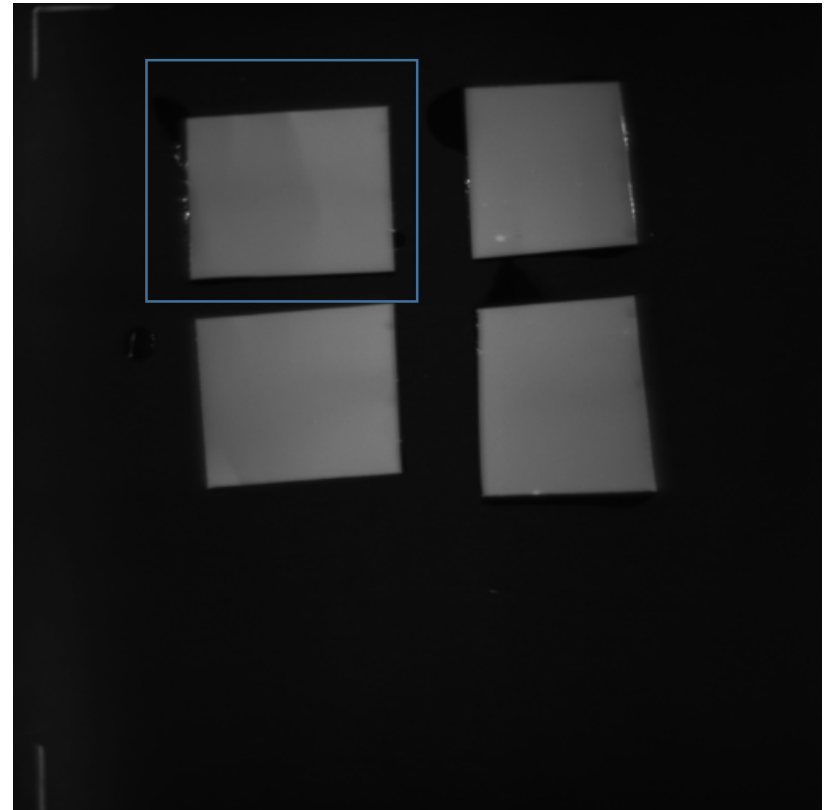

# Full images for Figure 4H

## Active caspase 3 blot

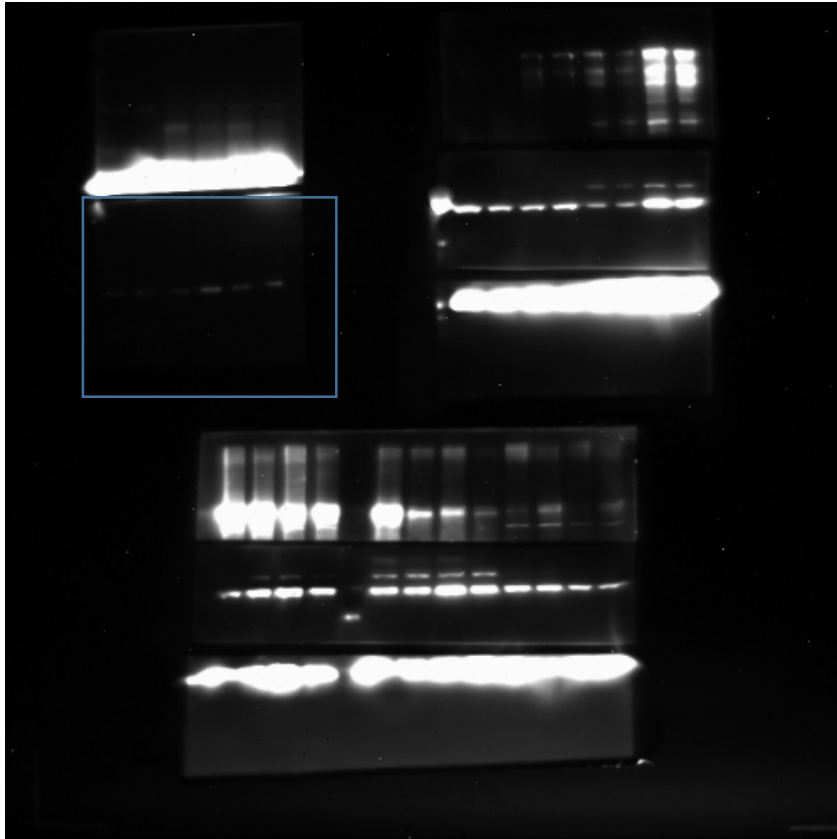

## Picture of PVDF membrane

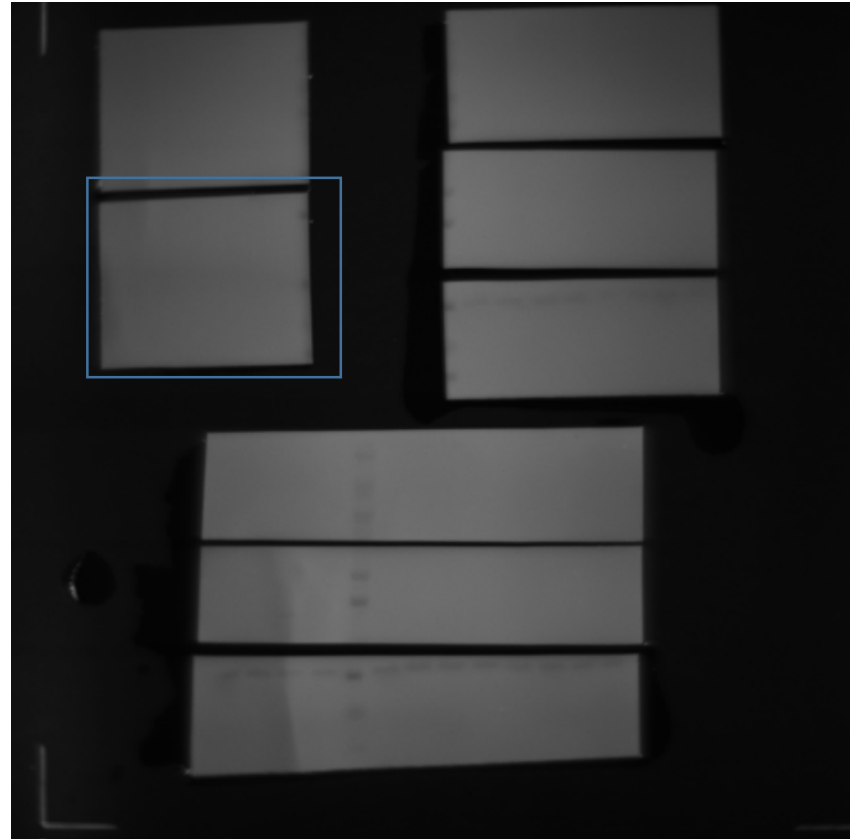

Full images for Figure 5H

Active caspase 3 blot

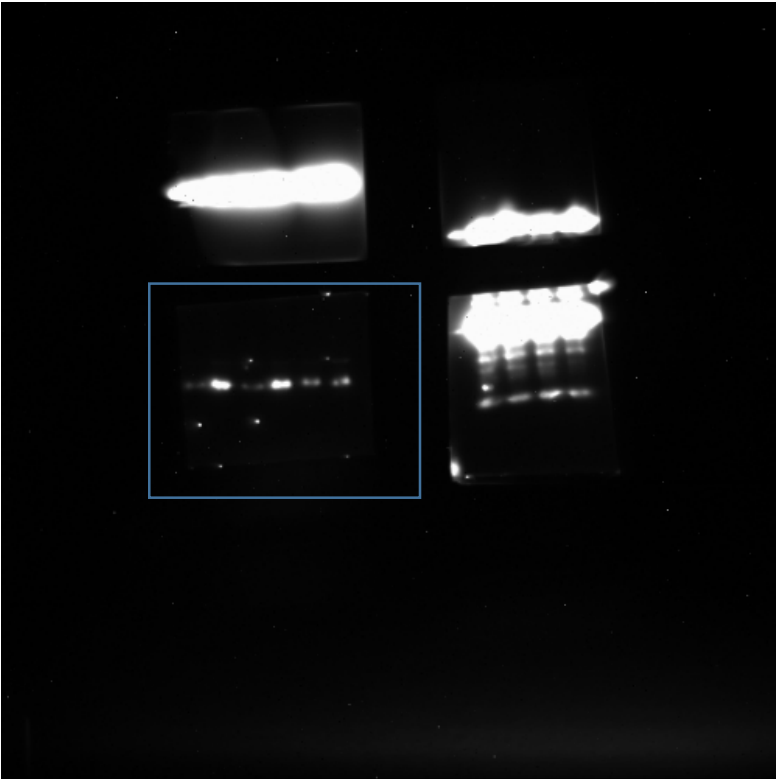

Picture of PVDF membrane

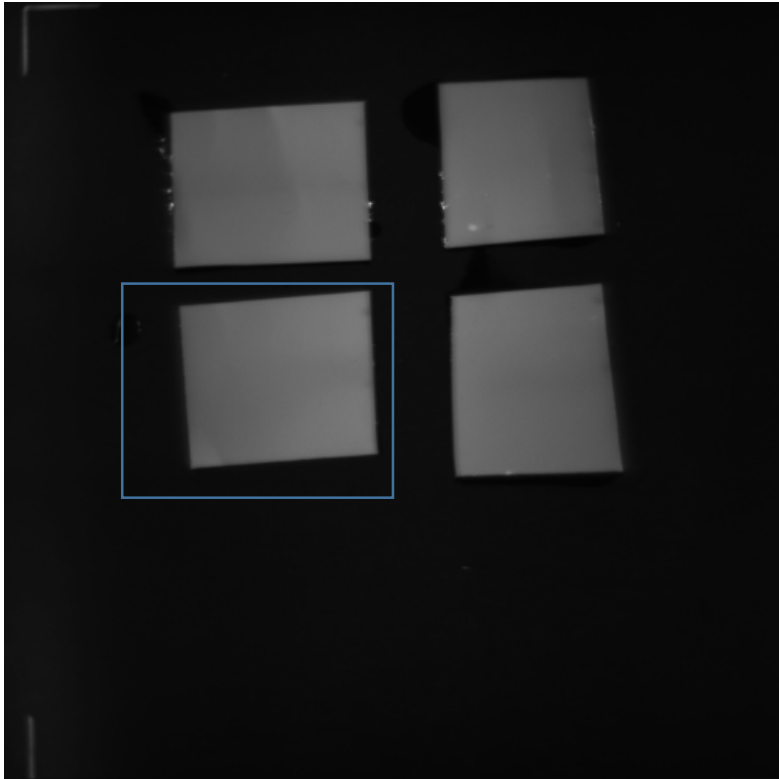

Full images for Figure 5H

Cyclophilin b blot

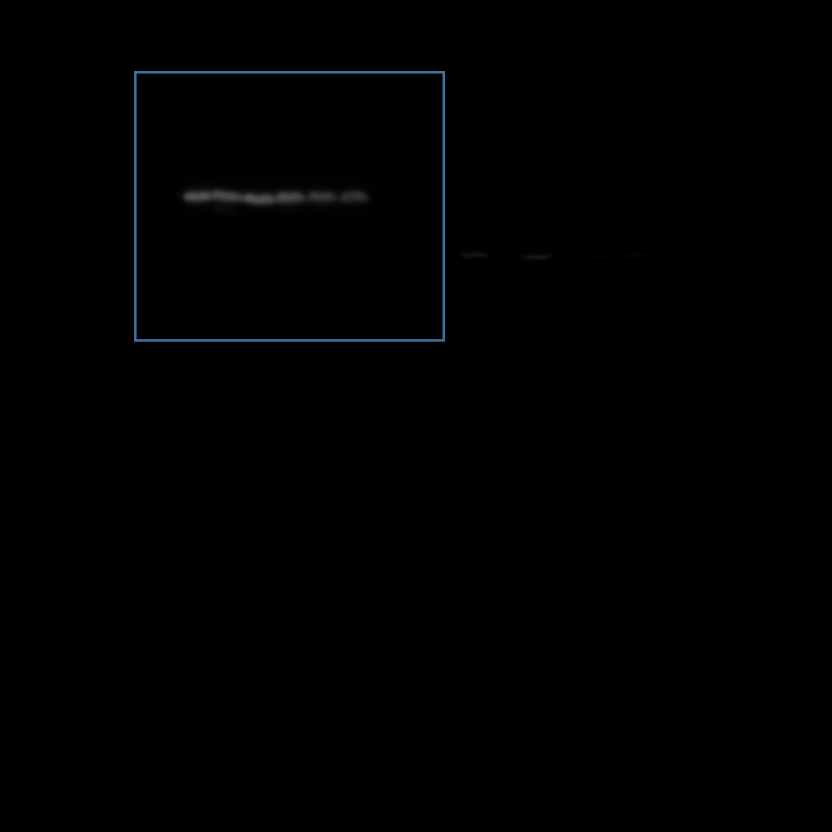

Picture of PVDF membrane

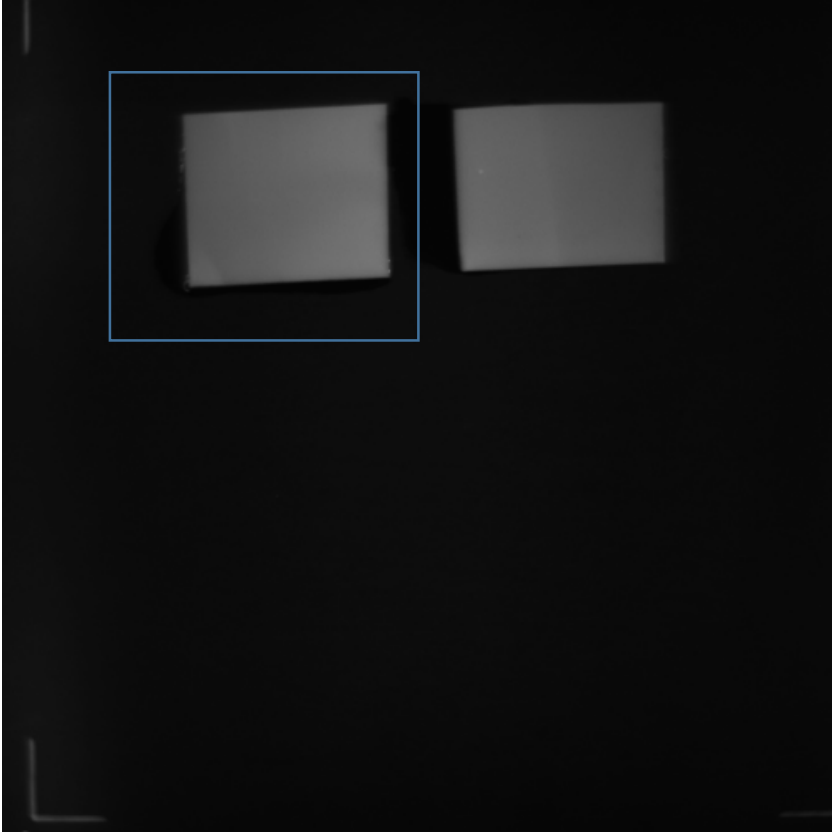

Full images for Figure 6E

Blot for Bak

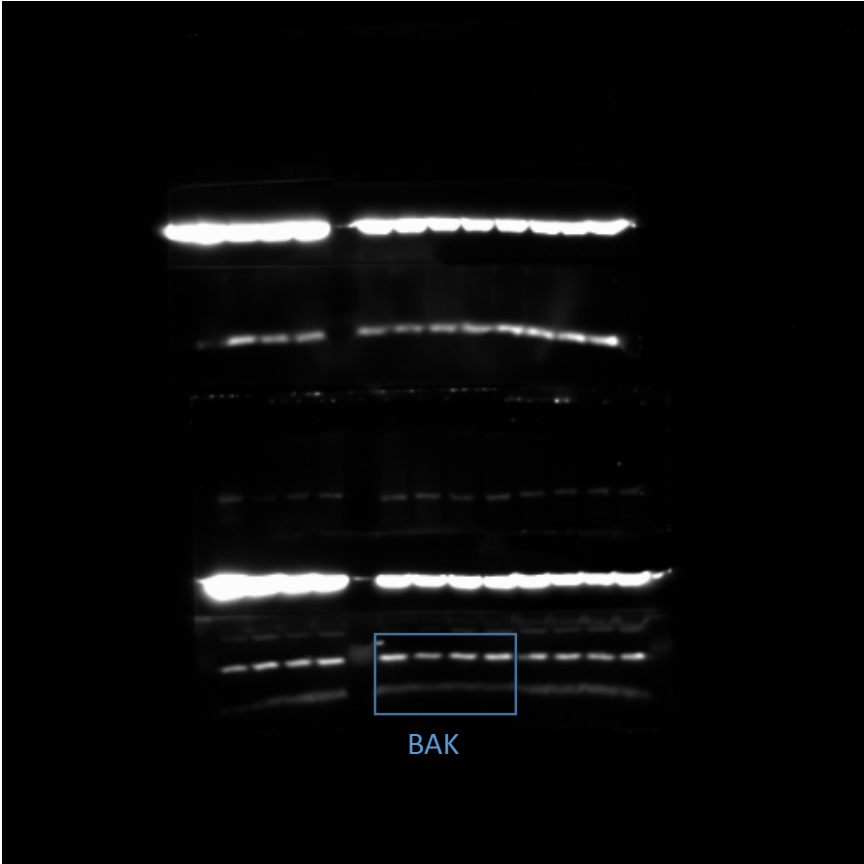

Picture of PVDF membrane

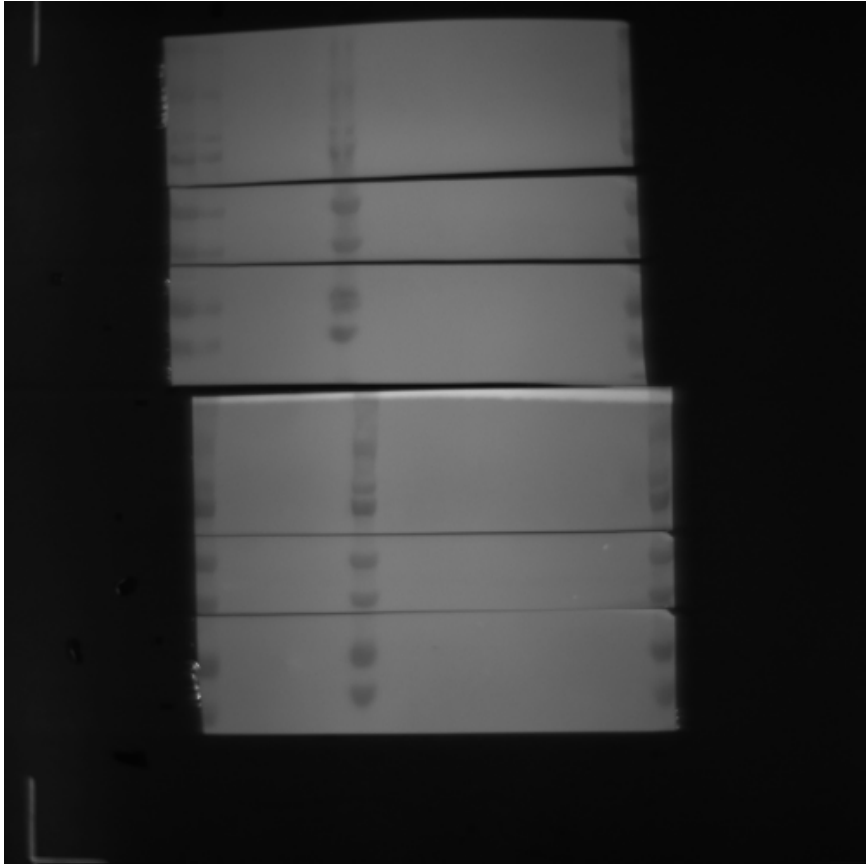



Full images for Figure 6E

Blot for p-Drp1(S-637)

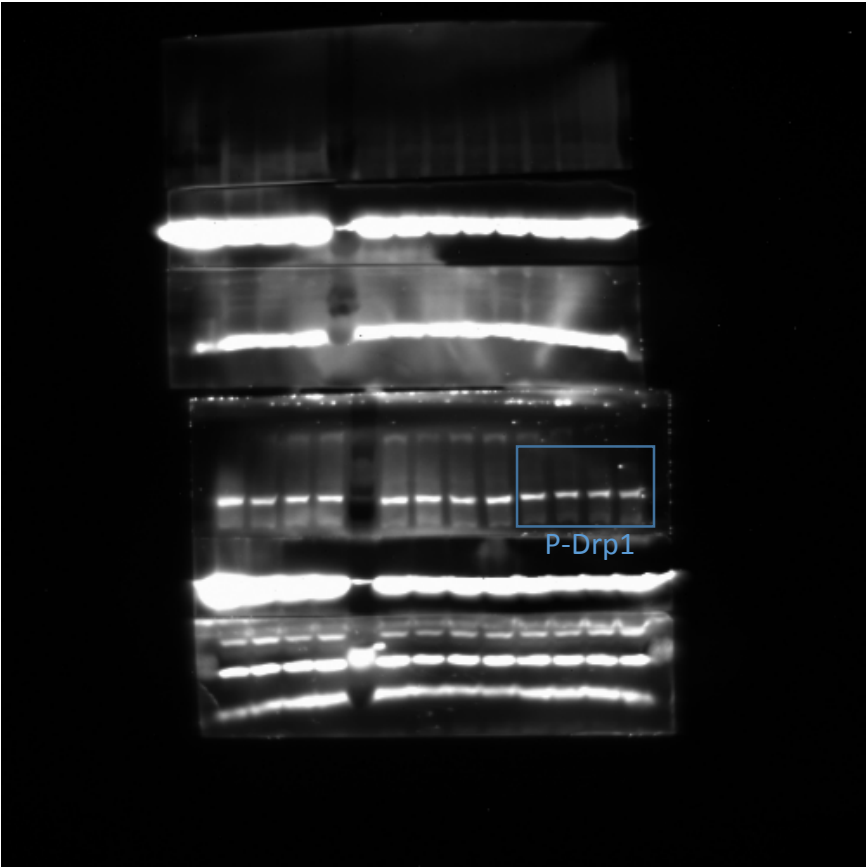

Picture of PVDF membrane



Full images for Figure 6E

Blots for  $\beta$ -actin

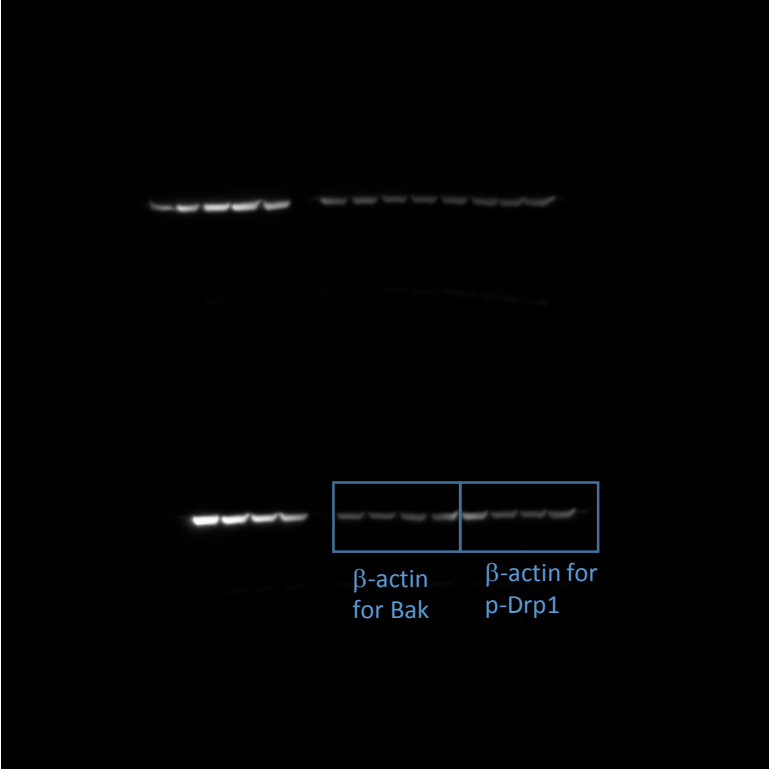

Picture of PVDF membrane

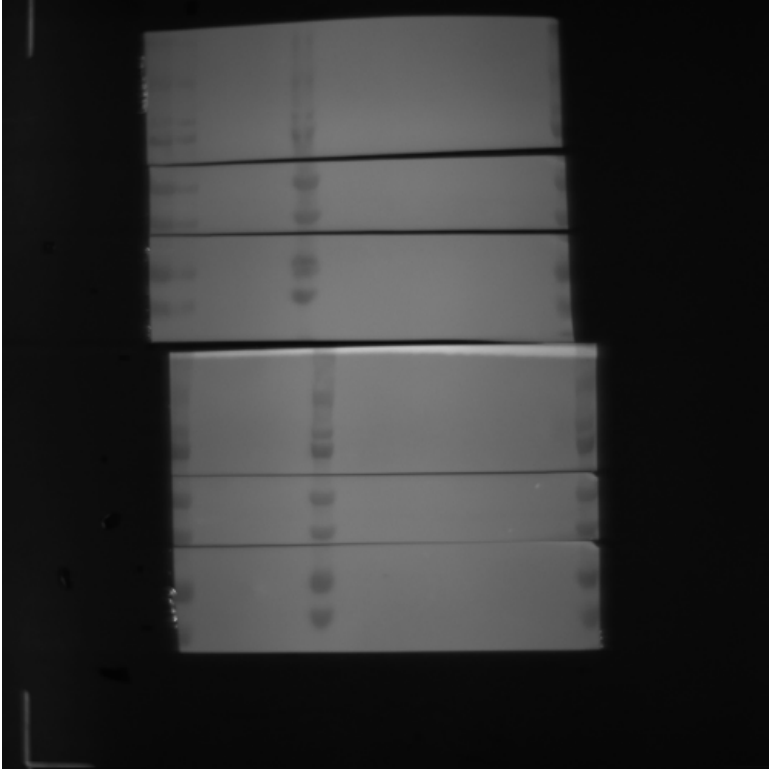

# Full images for Figure 6E

## Blots for Drp1 and $\beta$ -actin

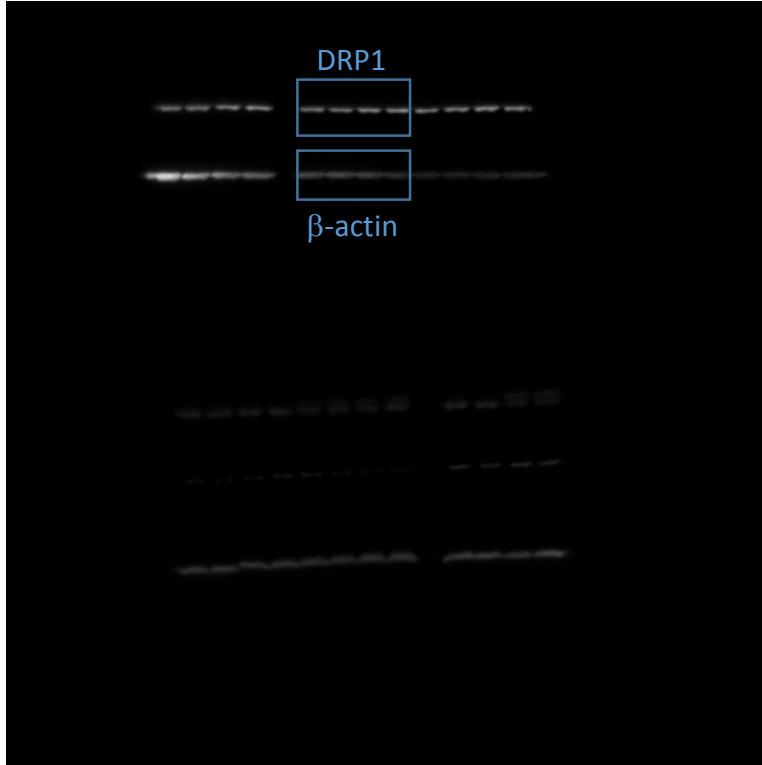

## Picture of PVDF membrane

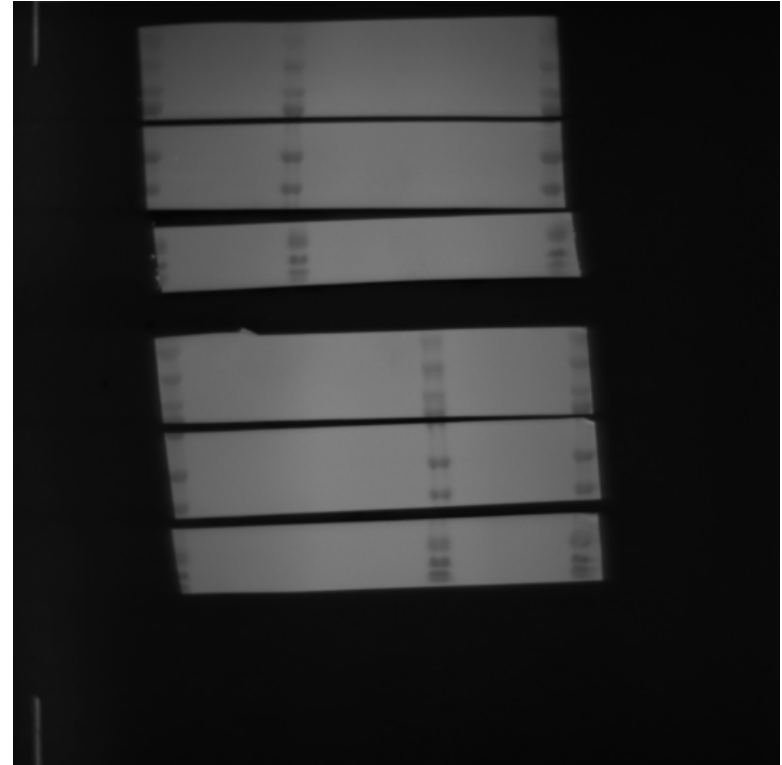

# Full images for Figure 6E

## Blots for OPA1, OMA1, Cyclophilin B

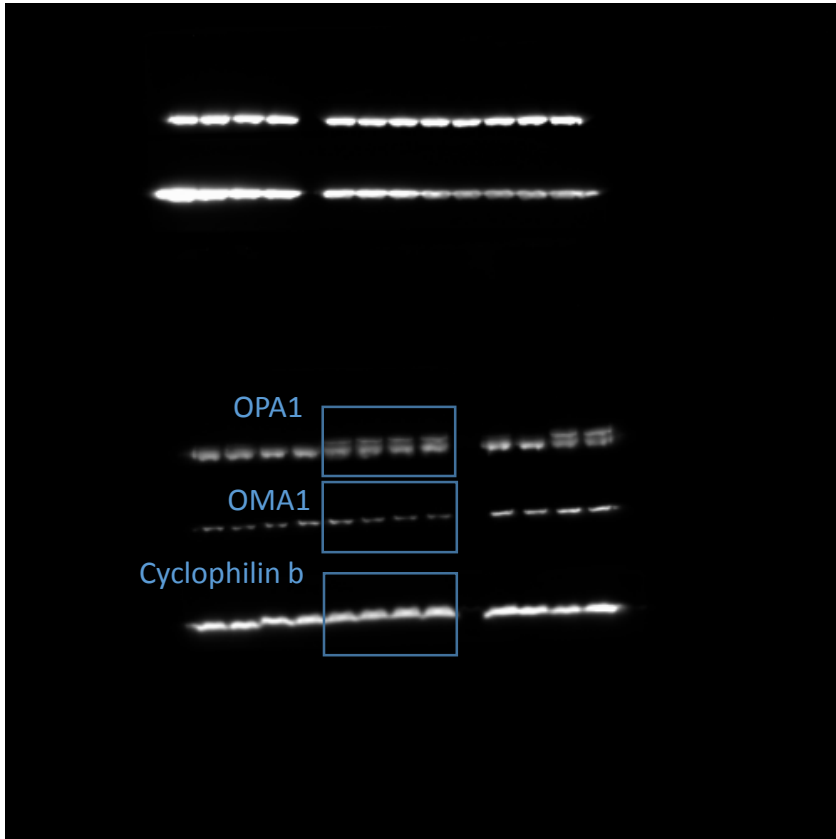

## Picture of PVDF membrane

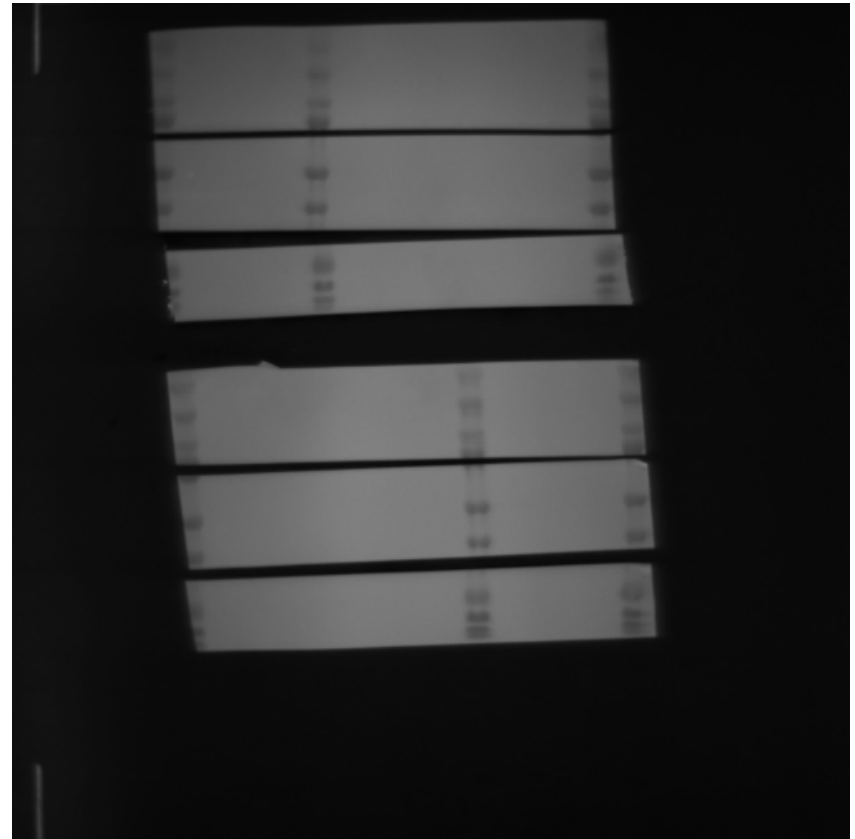

# Full images for Figure 6E

## Blot for MFN2

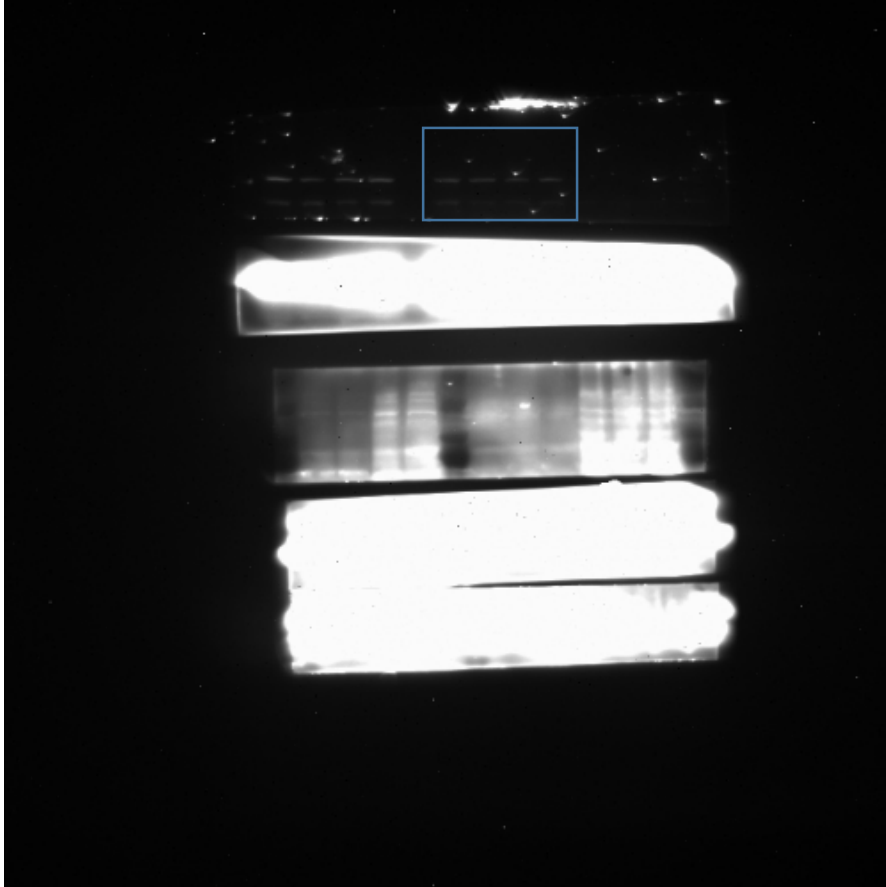

## Picture of PVDF membrane

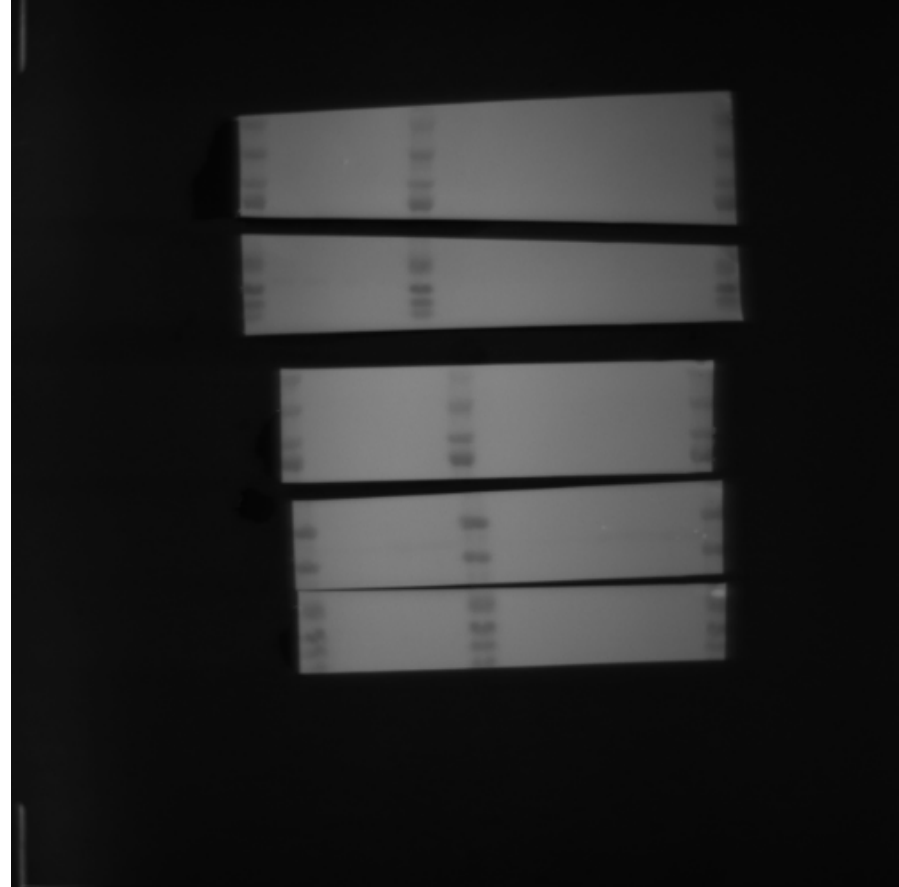

# Full images for Figure 6E

## Blot for cyclophilin b (MFN2)

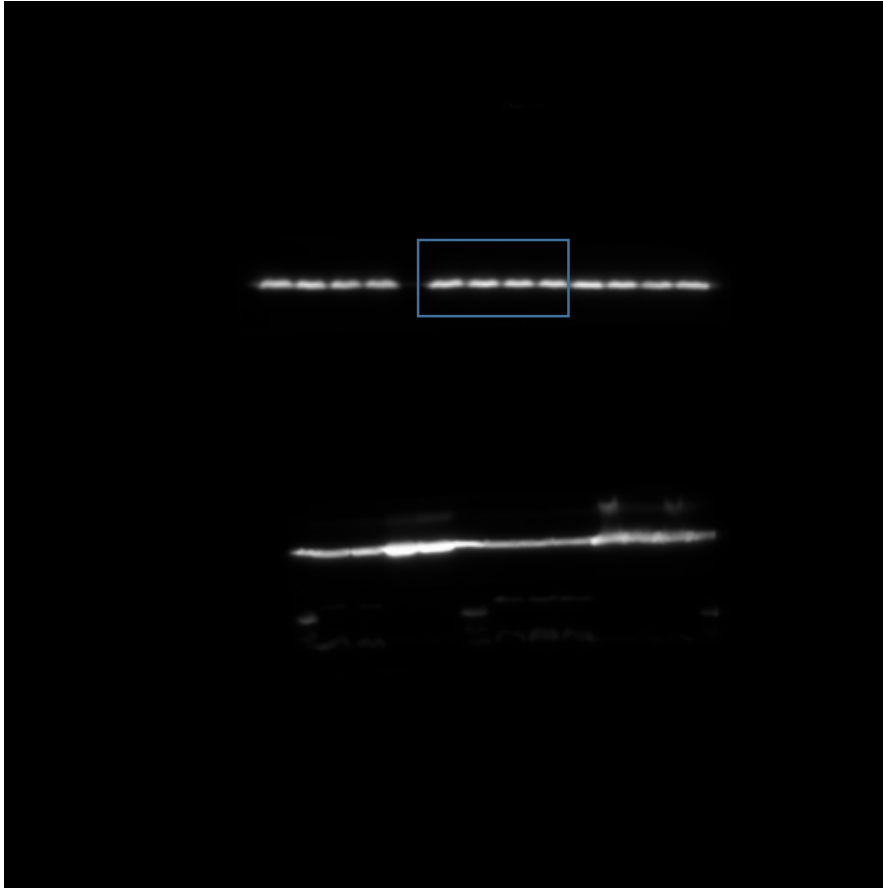

## Picture of PVDF membrane

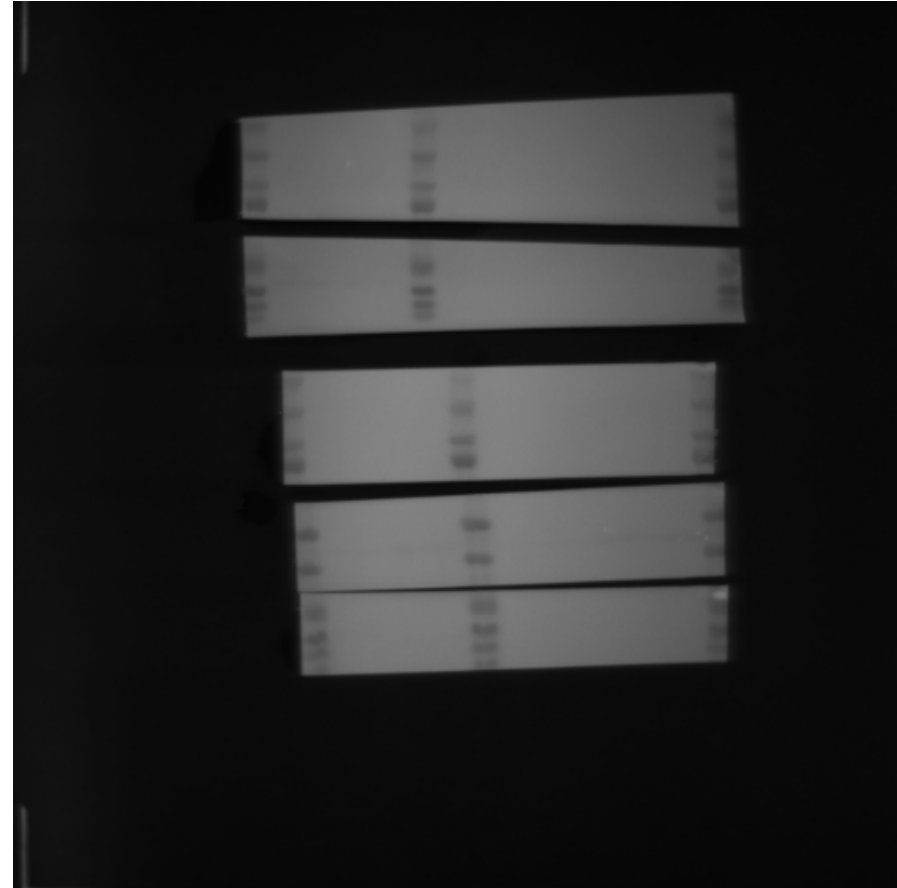

Full unedited blot for Figure 6E MFN1

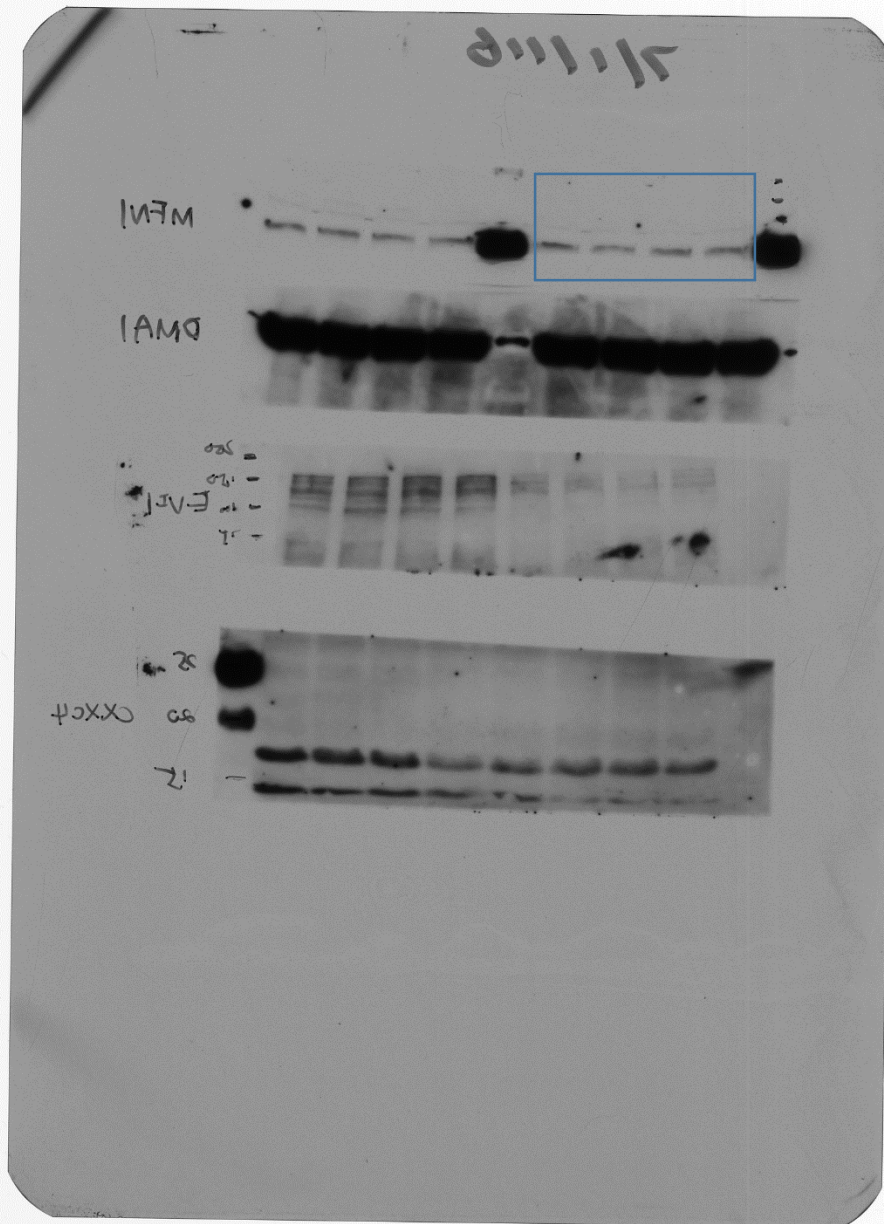

## Full images for Figure 6E

Blot for cyclophilin b (MFN1)

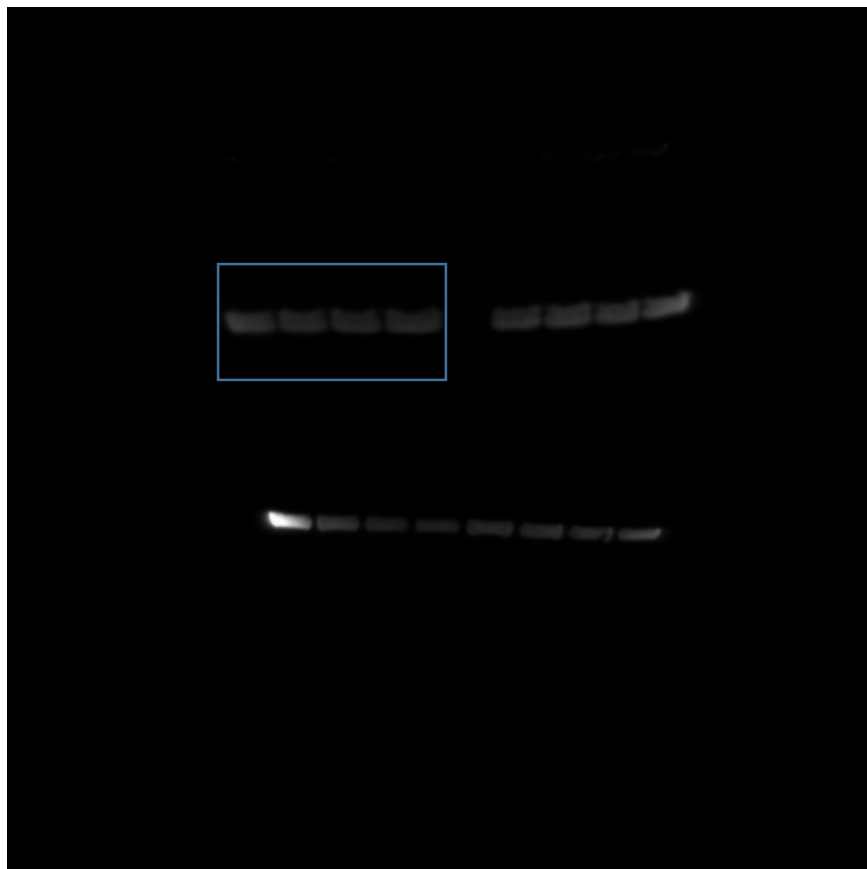

Picture of PVDF membrane

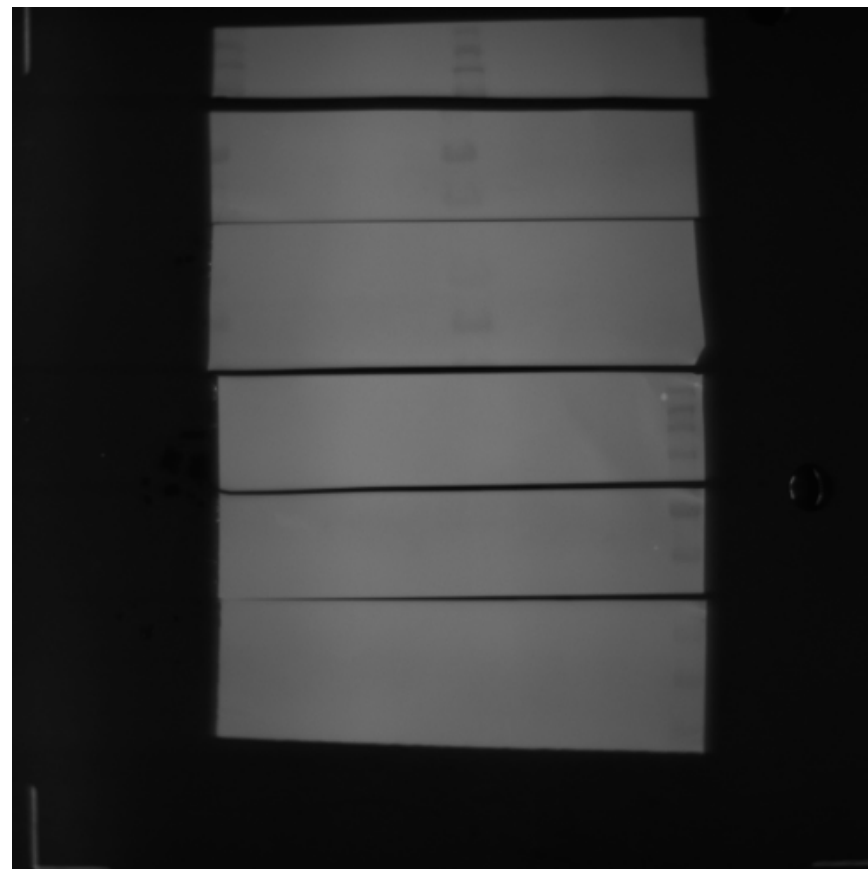



# Full images for Figure 7B and Figure 7C

## Blot for MTP18

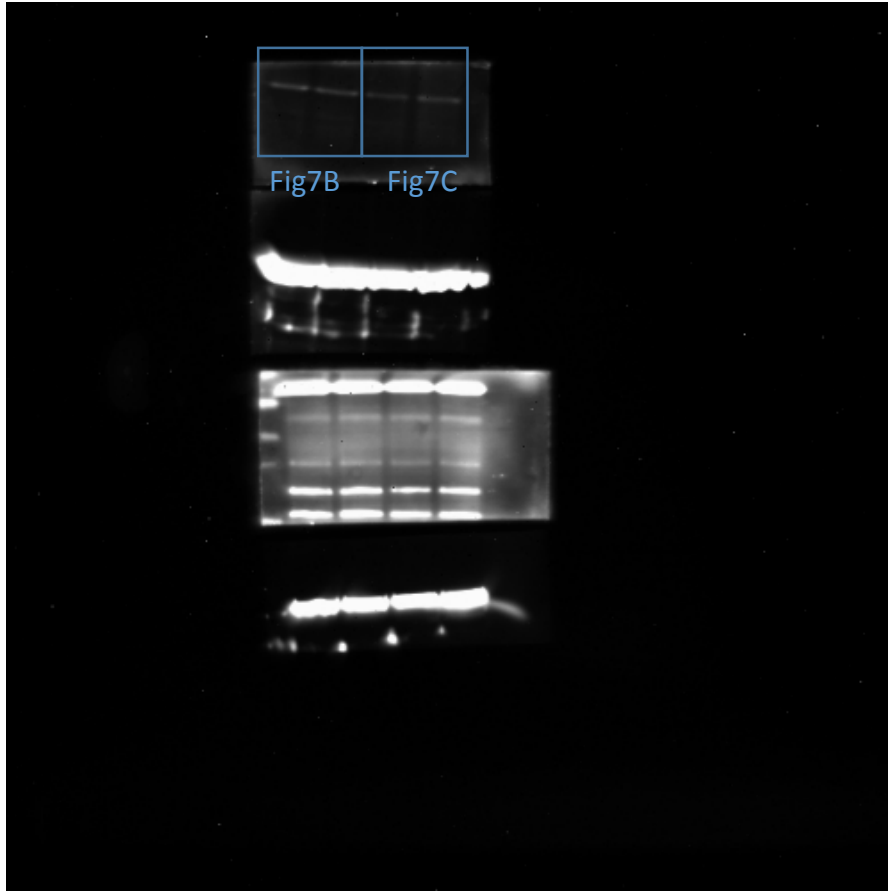

## Picture of PVDF membrane

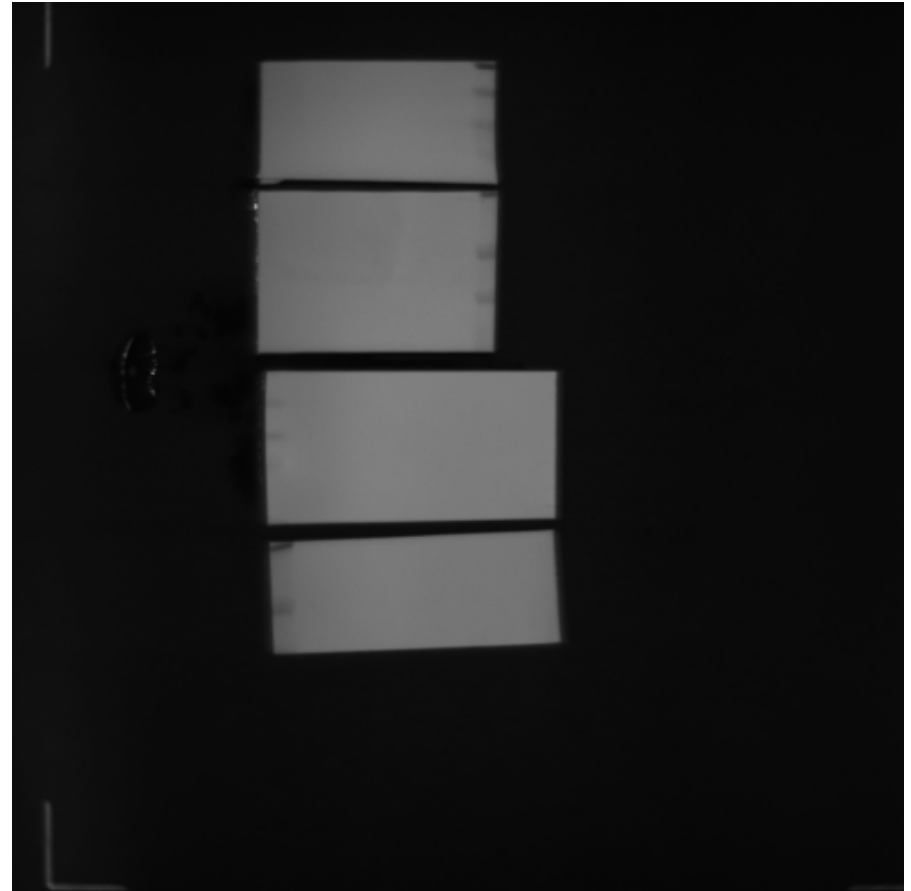

# Full images for Figure 7B and Figure 7C

## Blot for $\beta$ -actin

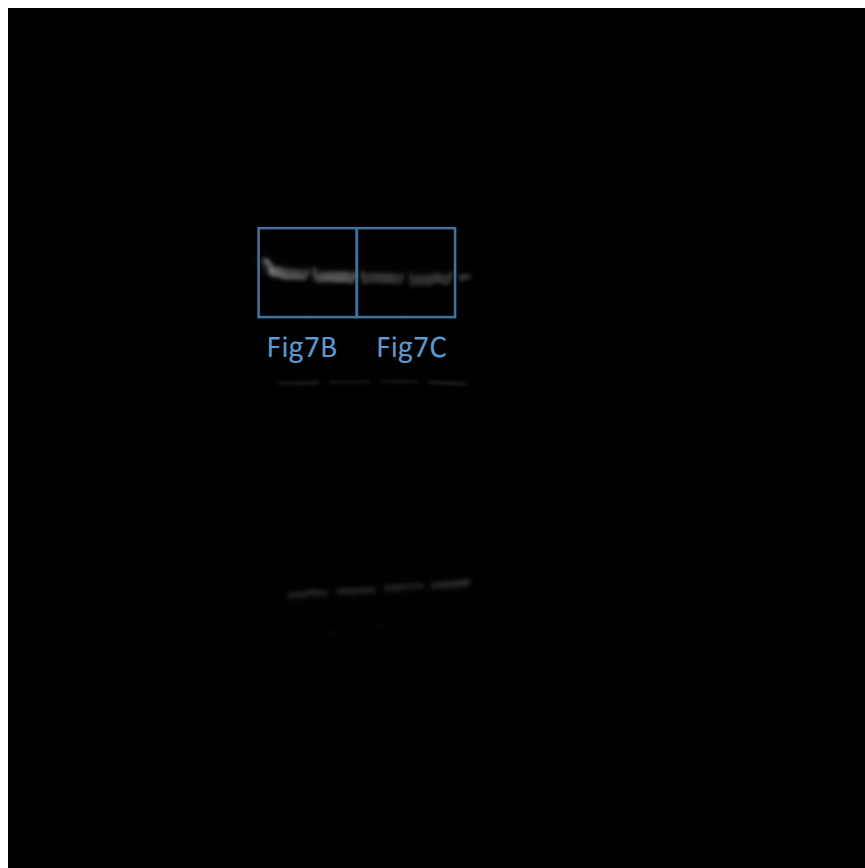

## Picture of PVDF membrane

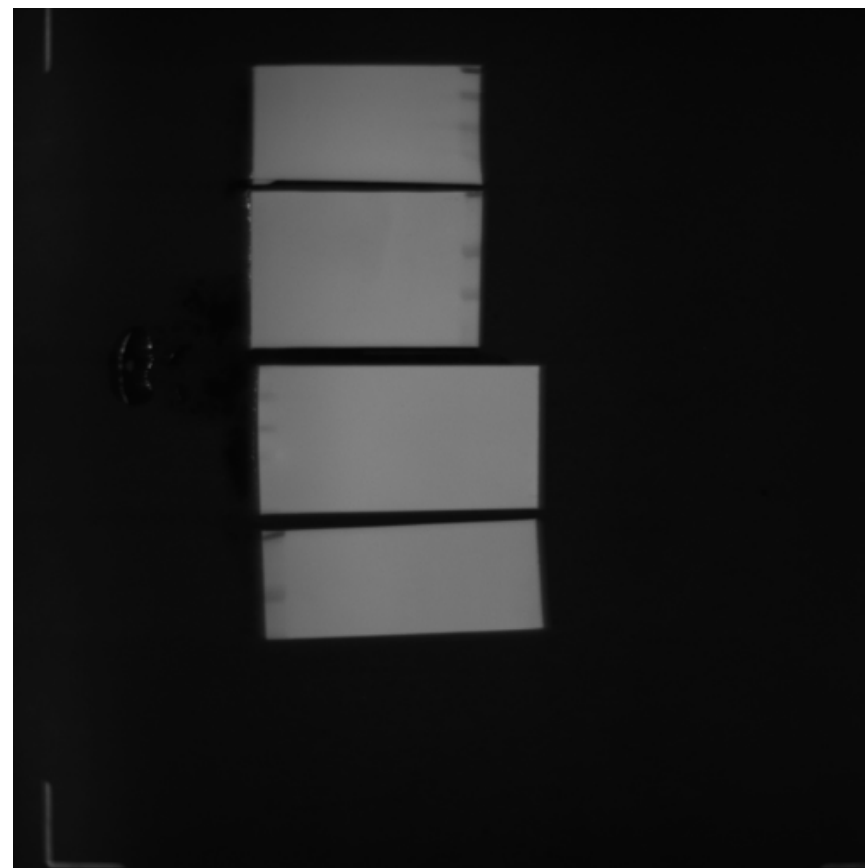

# Full images for Figure 7D

Blot for MTP18

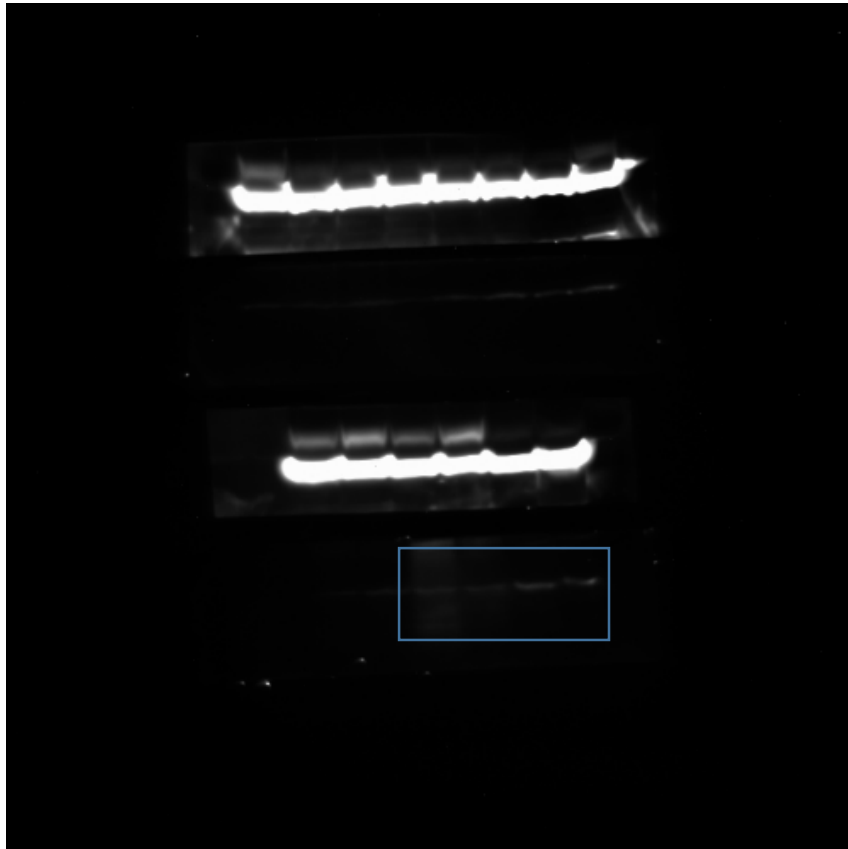

Picture of PVDF membrane

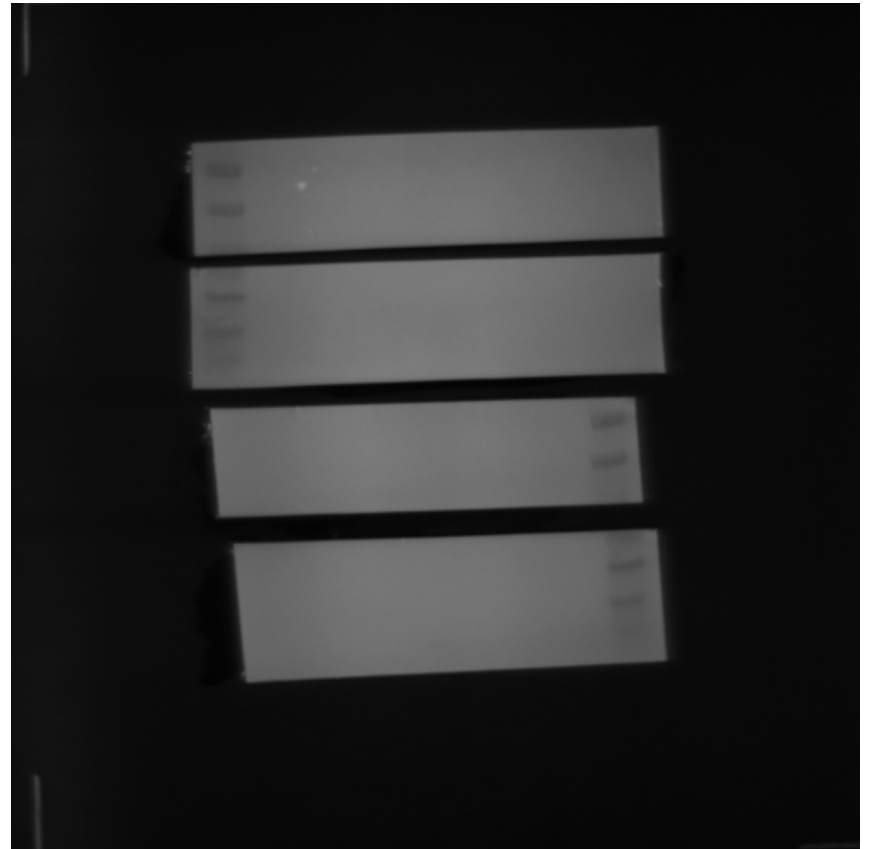

# Full images for Figure 7D

Blot for  $\beta$ -actin

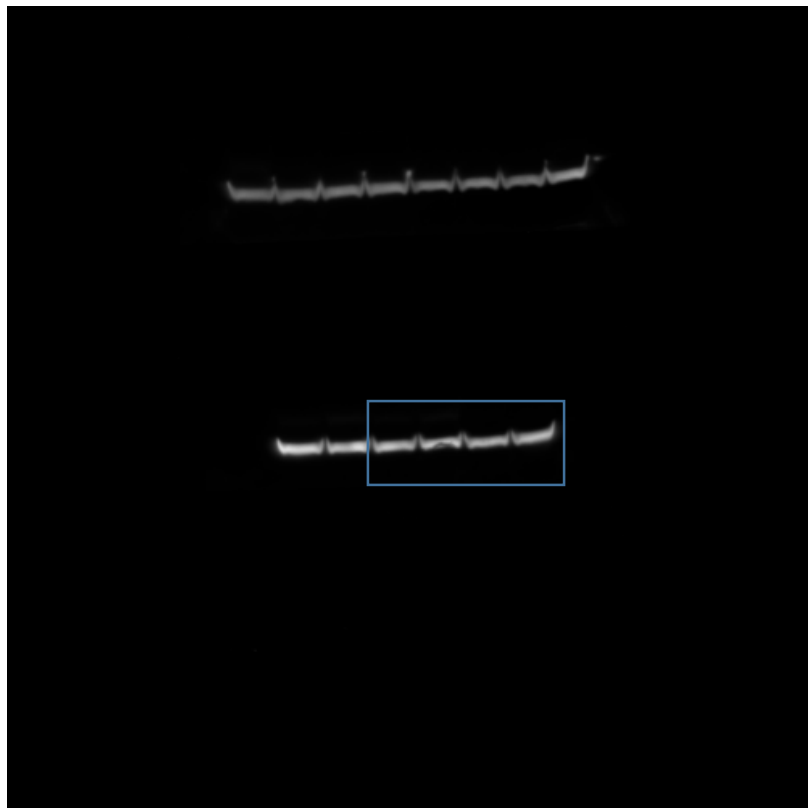

Picture of PVDF membrane

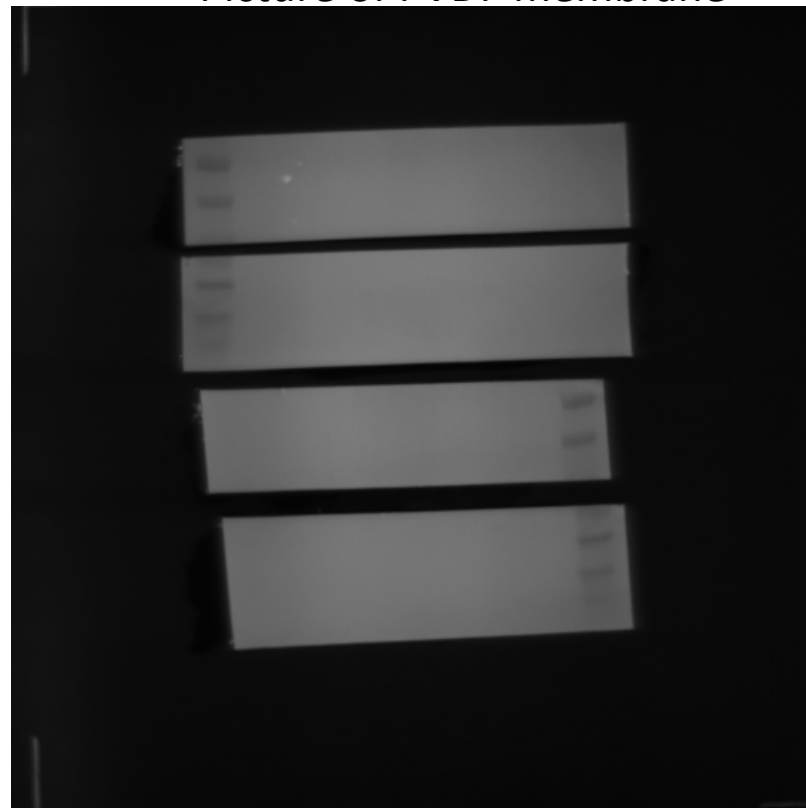

# Full images for Figure 7E

## Blot for MTP18

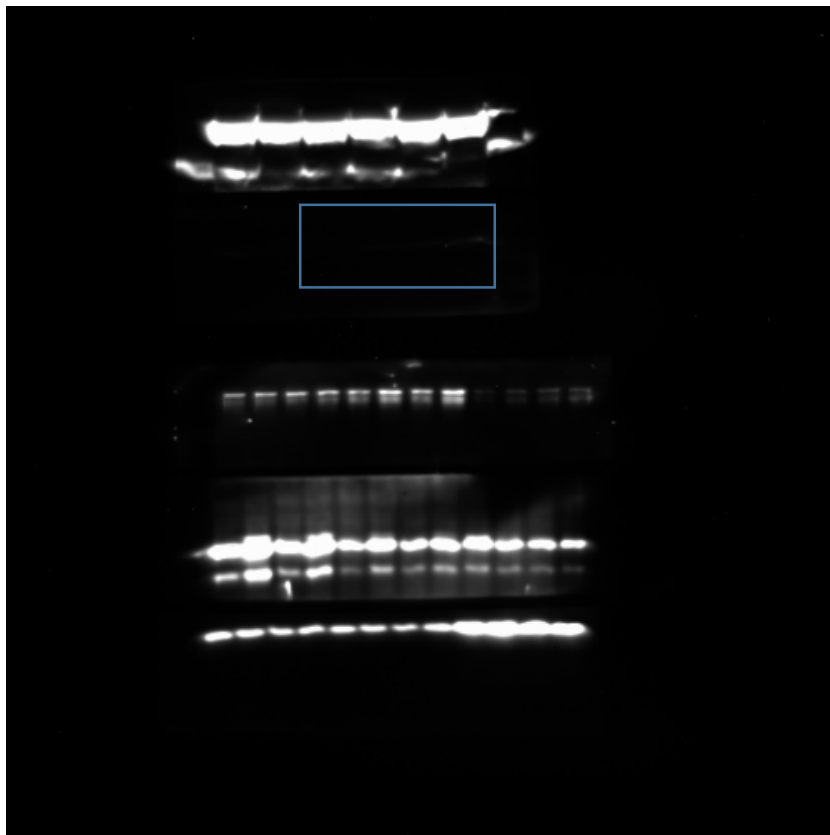

## Picture of PVDF membrane

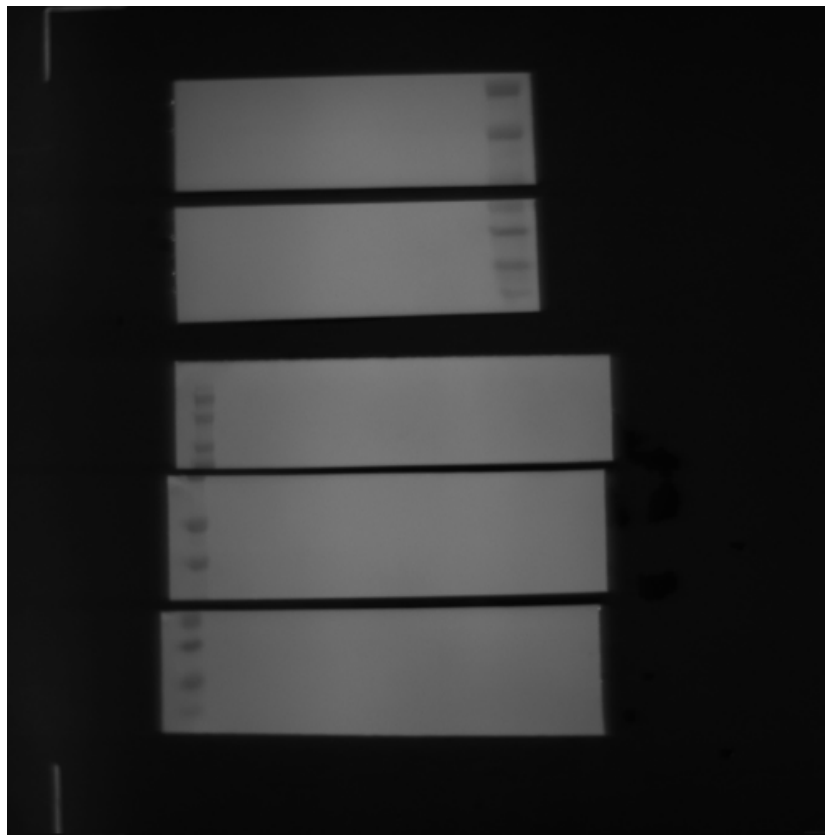

# Full images for Figure 7D

Blot for  $\beta$ -actin

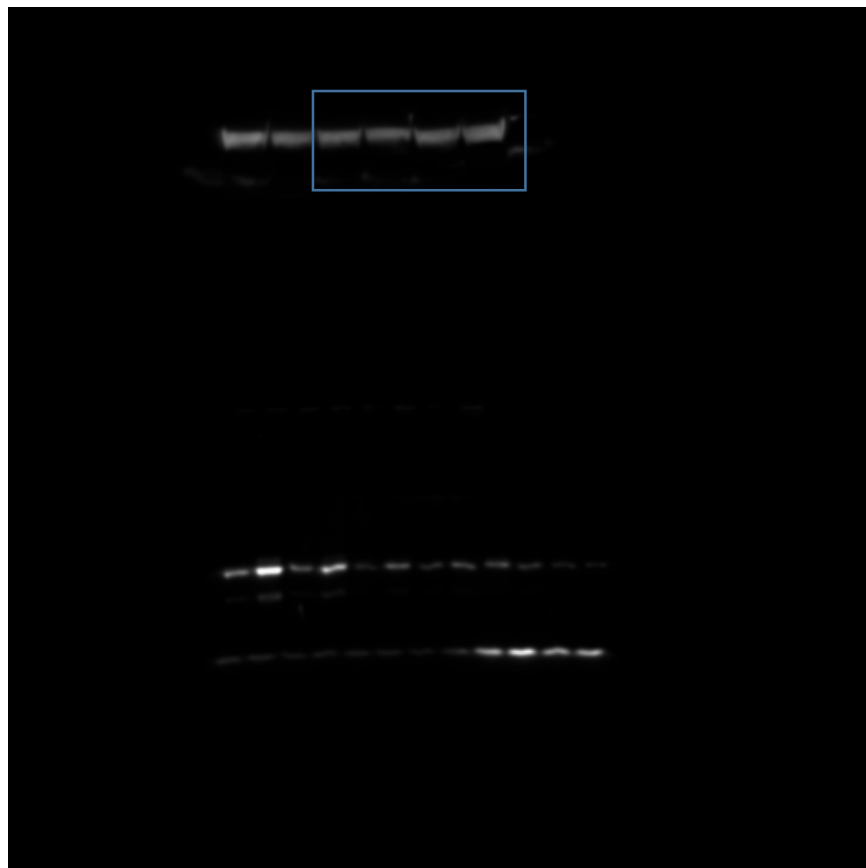

Picture of PVDF membrane

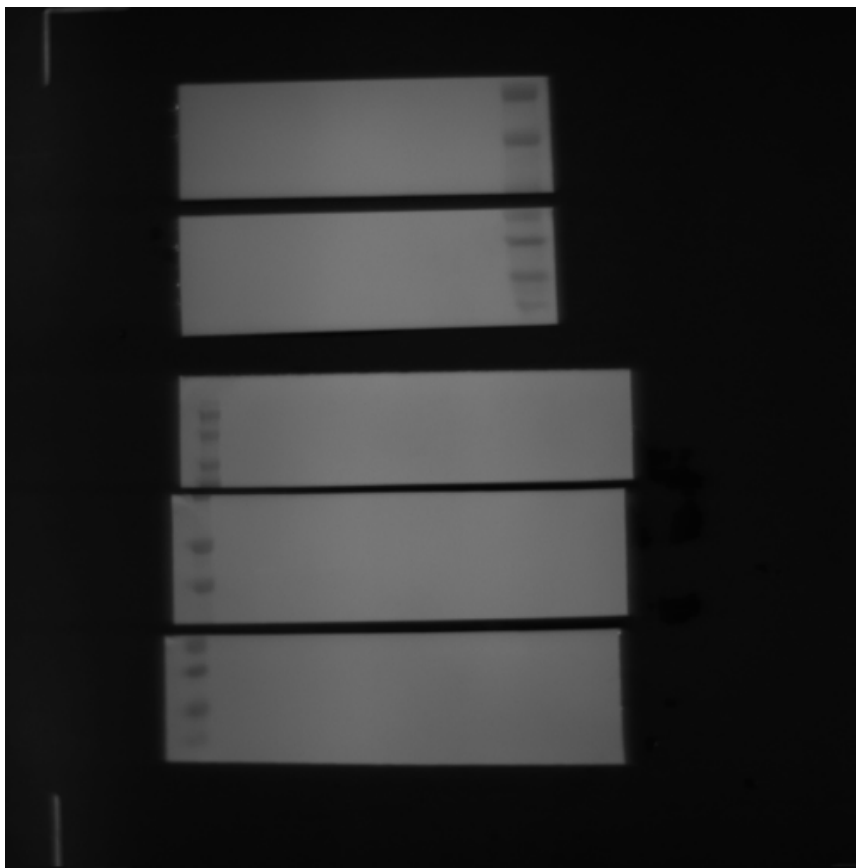

Full images for supplementary Figure 4A

Blot for HIF-1 $\alpha$

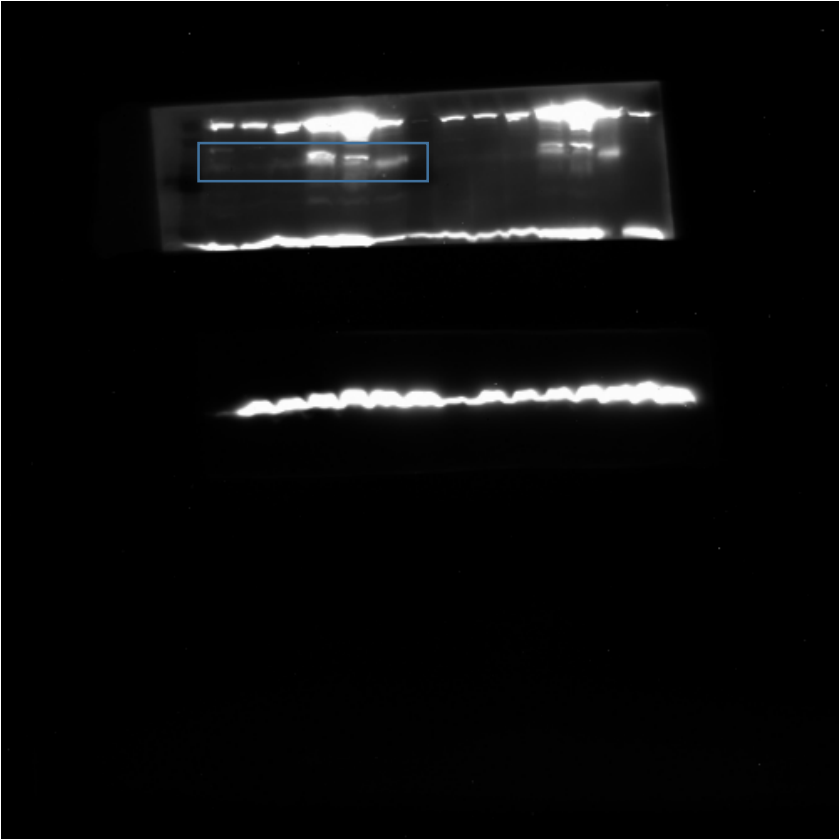

Picture of PVDF membrane

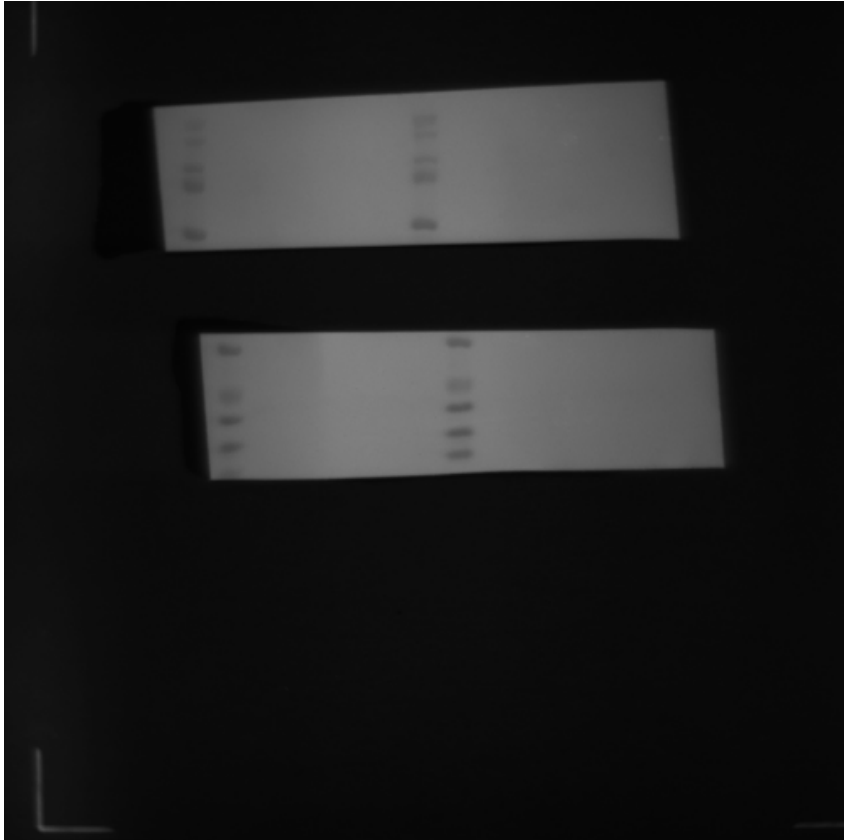

Full images for supplementary Figure 4A

Blot for cyclophilin b

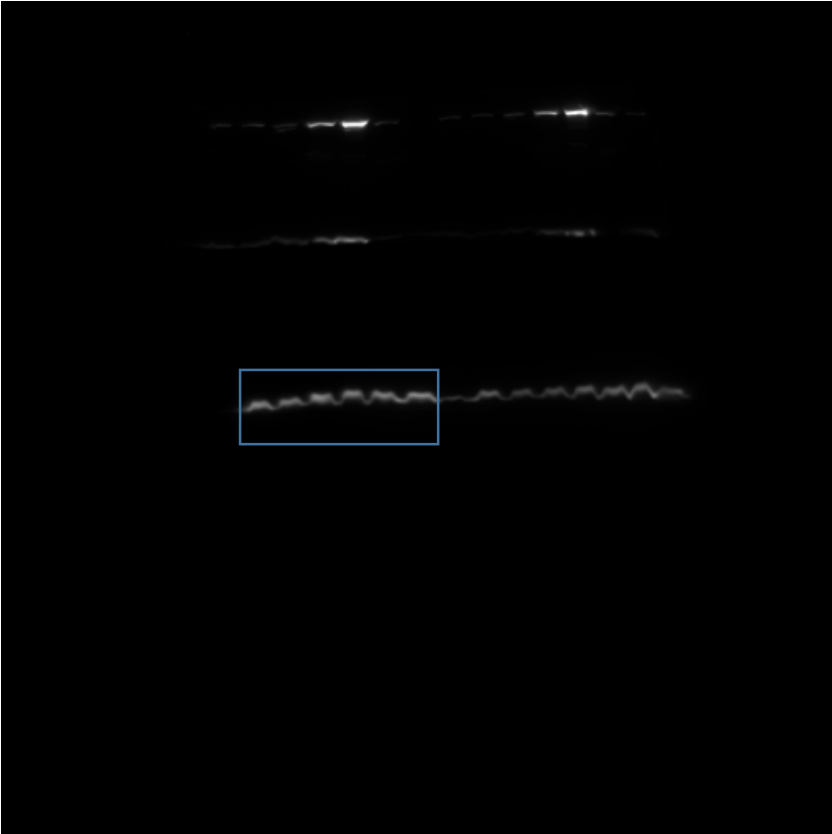

Picture of PVDF membrane

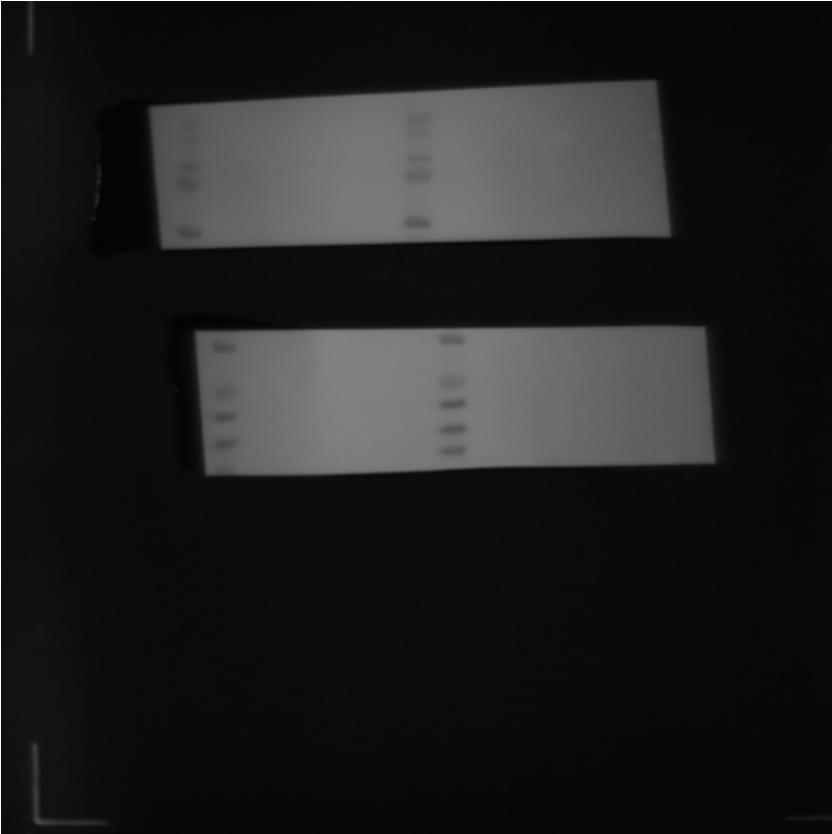



Full images for supplementary Figure 4A

Blot for MTP18

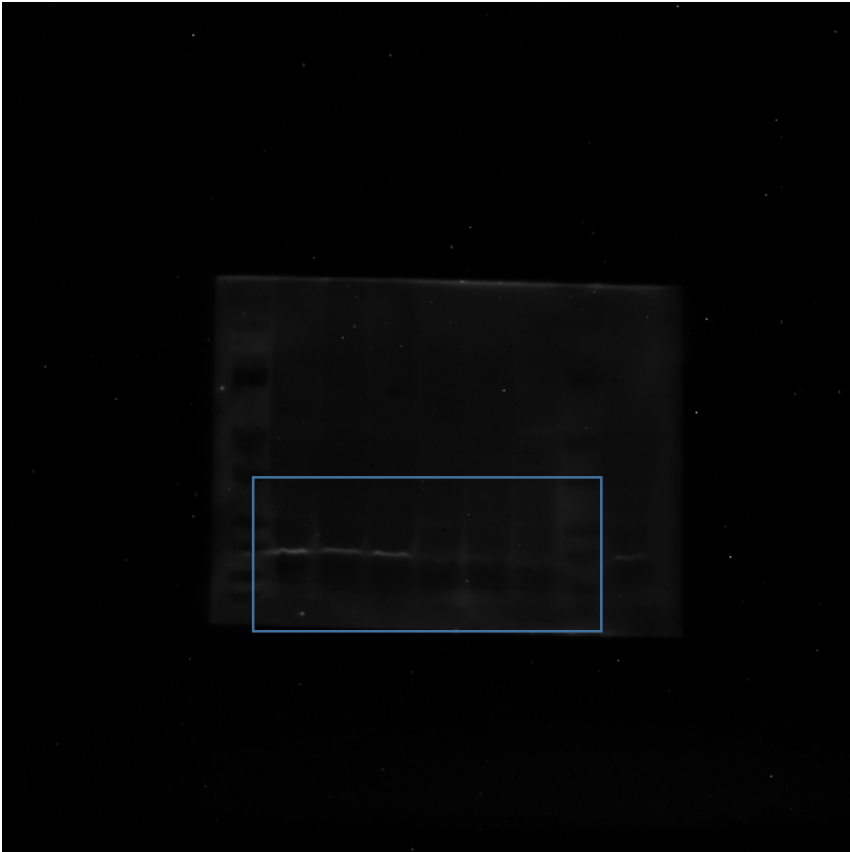

Picture of PVDF membrane

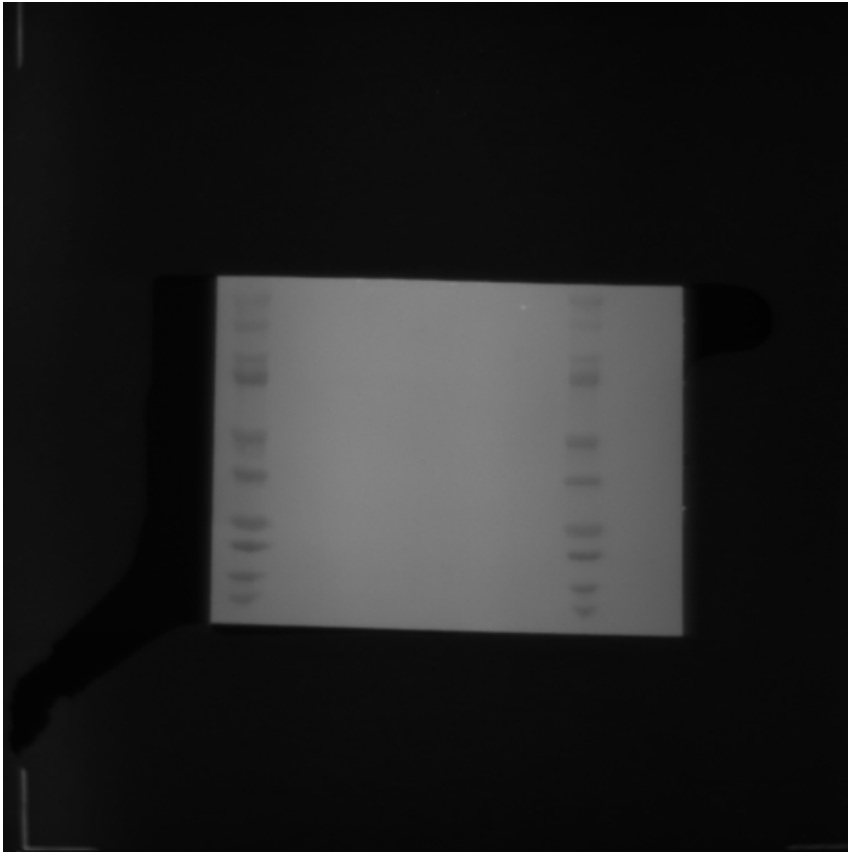

Full images for supplementary Figure 4A

Blot for cyclophilin b (MTP18)

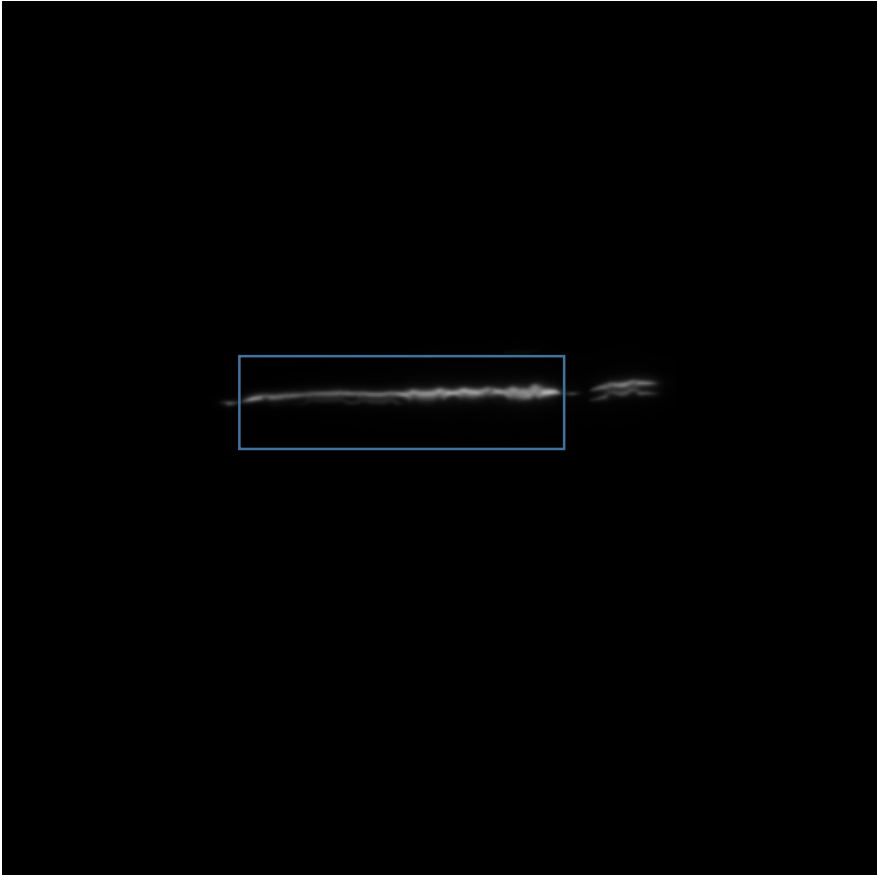

Picture of PVDF membrane

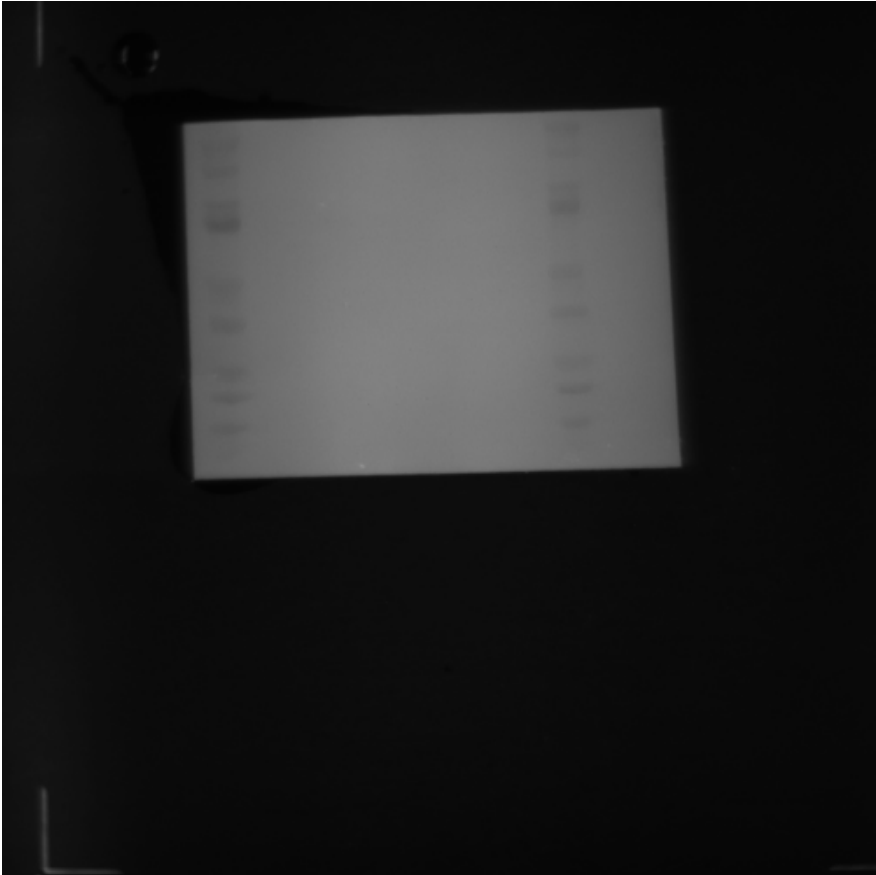

# Full images for supplementary Figure 5A

## Blots for HIF-1 $\alpha$ and cyclophilin b

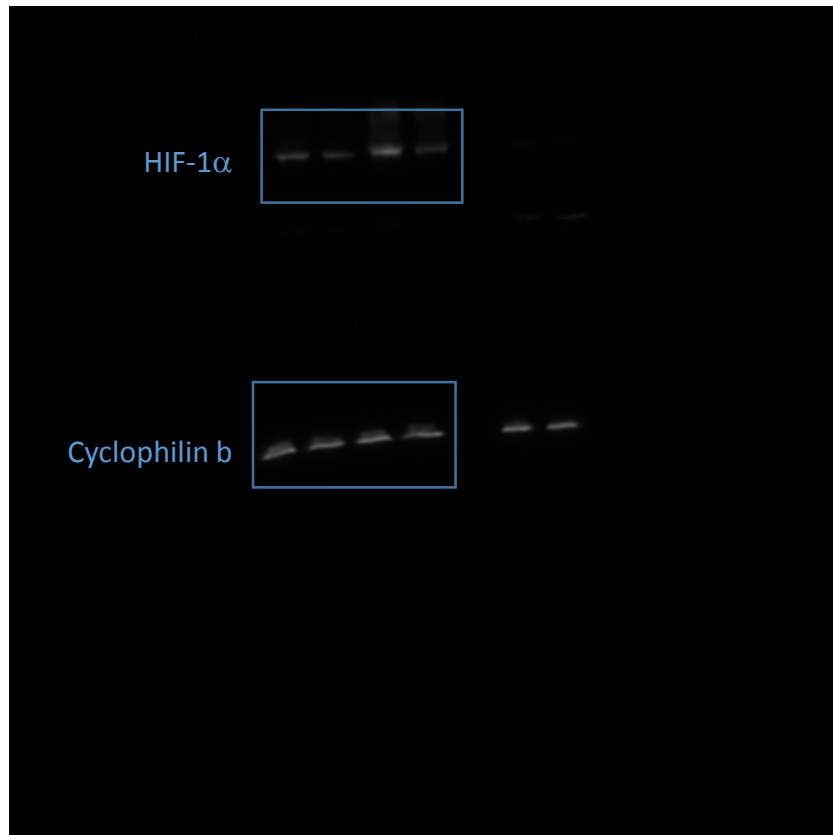

## Picture of PVDF membrane

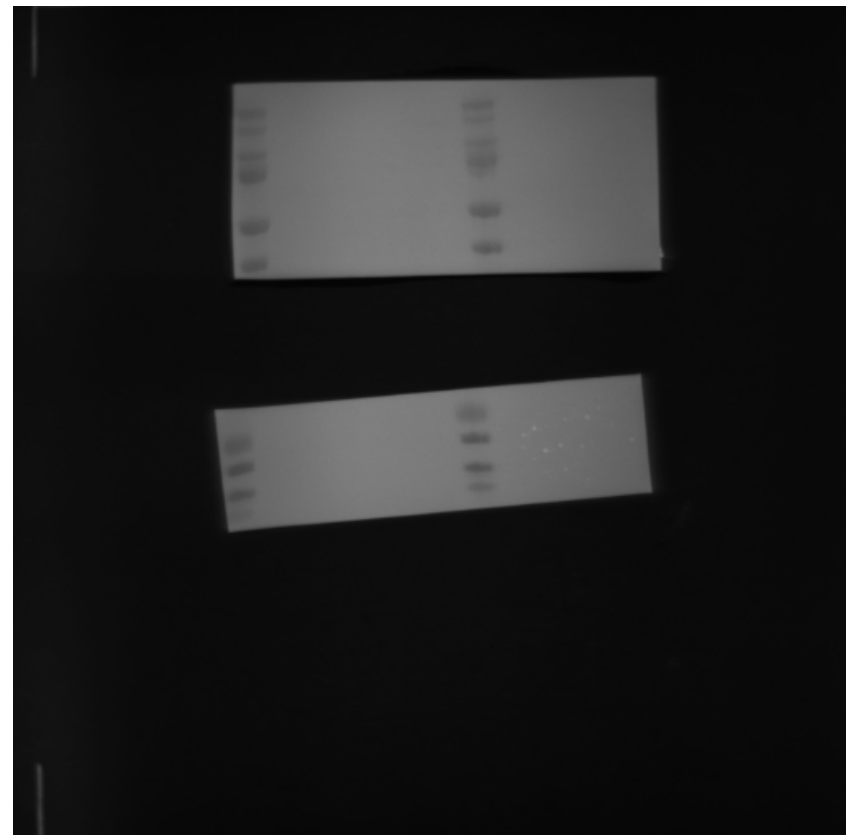

Supplement: jci-128-121859-s333.pdf [file jci-128-121859-s333.pdf]
